# Supplementary material for: Synthesis of difluorinated 3-oxo-N,3-diarylpropanamides from 4-arylamino coumarins mediated by Selectfluor
Source: Royal Society of Chemistry journal article supplement (doi:10.1039/d1qo01273h), 2021-01-01

## **Synthesis of Difluorinated 3-Oxo-*N*,3-Diarylpropanamides from 4-Arylamino Coumarins Mediated by Selectfluor**

Weiqliang Chen,<sup>†</sup> Hui-Jing Li,<sup>†</sup> Mei Liu,<sup>‡</sup> Pi-Xian Gong,<sup>†</sup> and Yan-Chao Wu<sup>\*,†</sup>

<sup>†</sup>Weihai Marine Organism & Medical Technology Research Institute, Harbin Institute of Technology, Weihai 264209, P. R. China.

<sup>‡</sup> China Building Material Test & Certification Group Zibo Co., Ltd., Zibo 255000, P. R. China

E-mail: ycwu@iccas.ac.cn

## 1. Table of Contents

|                                                         |     |
|---------------------------------------------------------|-----|
| 1. Table of Contents                                    | S1  |
| 2. General Information                                  | S2  |
| 3. Experimental Procedures                              | S3  |
| 4. Characterization Data of the substrates and products | S5  |
| 5. X-ray Crystallographic Data for <b>2a</b>            | S27 |
| 6. NMR Spectra of the Products                          | S33 |

## 2. General Information

All reactions were carried out under an atmosphere of air except noted. The solvents were distilled prior to use under a nitrogen atmosphere. Silica gel (200–300 mesh) was used for flash chromatography. The 4-arylamino coumarins were prepared according to the literature procedures, and other reagents were purchased from commercial sources and used directly. High-resolution mass spectra (HRMS) were recorded by using an Electrothermal LTQ-Orbitrap mass spectrometer. Melting points were measured by using a Gongyi X-5 microscopy digital melting point apparatus and are uncorrected.  $^1\text{H}$  and  $^{13}\text{C}$ -NMR spectra were recorded with a Bruker Avance III 400 MHz NMR spectrometer with  $\text{CDCl}_3$  as solvent. The chemical shifts are reported in ppm relative to  $\text{CDCl}_3$  ( $\delta = 7.26$ ) and  $\text{DMSO-}d$  ( $\delta 2.5$ ) for  $^1\text{H}$  NMR and relative to the central  $\text{CDCl}_3$  resonance ( $\delta = 77.0$ ) and  $\text{DMSO-}d$  ( $\delta 40.0$ ) for  $^{13}\text{C}$  NMR. Coupling constants ( $J$ ) are quoted in Hz. NMR data of known compounds is in agreement with literature values.<sup>1-5</sup> Multiplicities are reported as follows: singlet (s), doublet (d), doublet of doublets (dd), triplet (t), quartet (q), and multiplet (m).

### 3. Experimental Procedures

#### 3.1 General procedure for the synthesis of 4-aryl amino coumarins<sup>1-5</sup>

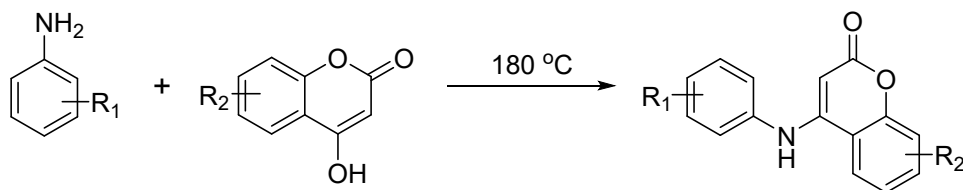

A mixture of 4-hydroxy-2*H*-chromen-2-ones (1.0 mmol) and anilines (3.0 mmol, 3.0 equiv) (without solvent) in a 10 mL flask was heated at 180 °C till the end of reaction. After being cooled to room temperature, the reaction mixture was washed with methanol (5 mL) at 60 °C for 0.5 h and then filtered and washed with methanol to give the desired 4-aryl amino coumarins without further purification.

#### 3.2 General Procedure for the Synthesis of **2**

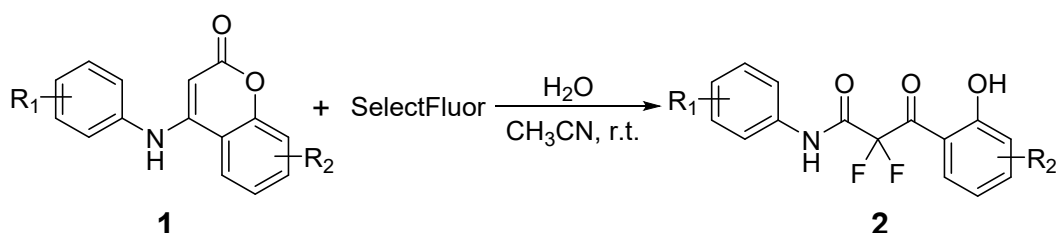

The mixture of 4-aryl amino coumarins **1** (1.0 equiv., 0.3 mmol), SelectFluor (0.66 mmol), and H<sub>2</sub>O (5.0 equiv., 1.5 mmol) in CH<sub>3</sub>CN (2.0 mL) was stirred at room temperature for 3.0 h. The reaction mixture was quenched with saturated NaHCO<sub>3</sub>. H<sub>2</sub>O (5 mL) was added to the mixture and extracted with CH<sub>2</sub>Cl<sub>2</sub> (10 mL × 3). Combined organic phase was washed with brine and dried over Na<sub>2</sub>SO<sub>4</sub>, and then filtered, the solvent was removed in a rotary evaporator. The residue was purified by flash chromatography (ethyl acetate/petroleum ether mixtures) to give the desired product **2**.

#### 3.3 Verification experiment for the Synthesis of **2a-O**<sup>18</sup>

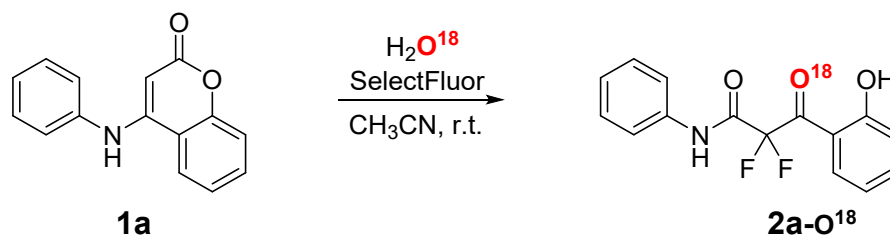

## MS-analytical Results:

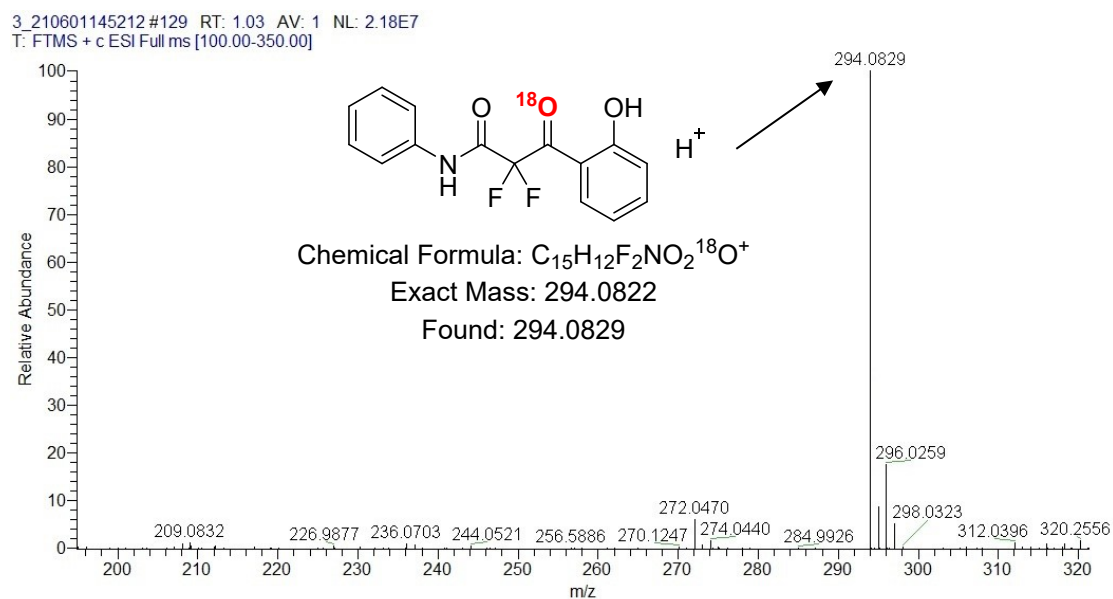

## 3.4 Cell viability and antidiabetic assay

Hep G2 cells were cultured in Dulbecco's Modified Eagle's Medium (DMEM) supplemented with 10 % FBS and 1 % penicillin/streptomycin. Hep G2 cells were seeded in 96-well plates at the concentration of  $1 \times 10^4$  cells/well. After incubation for 24 h, cells were exposed to several types of compounds at three concentrations (0.4  $\mu\text{g/mL}$ , 2  $\mu\text{g/mL}$ , 10  $\mu\text{g/mL}$ ) for 24 h. The cell viability of treatment was assayed by MTT method.<sup>6</sup> To induce insulin resistance, the cells were treated as the previous method of our group with some modification.<sup>7</sup> Briefly, cells were seeded in 96-well plates at the concentration of  $1 \times 10^4$  cells/well. After 24 h, glucosamine (18 mM) was added to the medium for 18 h. The above compounds were added and incubated with 100 nM insulin for 24 h. The glucose content in the supernatant was measured using a commercial POD-GOD kit (Jiancheng Co., Ltd., Nanjing, China).

## 4. Characterization Data of the substrates and products

### 4.1 Spectral Data of Substrates 1

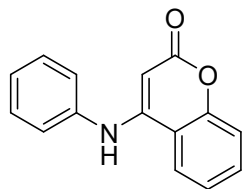

#### 4-(phenylamino)-2H-chromen-2-one (**1a**)

Synthesis carried out according to the General Procedure, compound **1a** was obtained in 80% yield as a yellowish solid after purification. mp 265–266 °C (lit.<sup>1</sup> mp 267–268 °C). <sup>1</sup>H NMR (400 MHz, DMSO-*d*<sub>6</sub>)  $\delta$  (ppm): 9.32 (s, 1H), 8.25 (d, *J* = 8.0 Hz, 1H), 7.65 (t, *J* = 7.4 Hz, 1H), 7.49 (t, *J* = 7.2 Hz, 2H), 7.39 (s, 4H), 7.29 (t, *J* = 6.8 Hz, 1H), 5.31 (s, 1H). <sup>13</sup>C NMR (100 MHz, DMSO-*d*<sub>6</sub>)  $\delta$  (ppm): 161.9, 153.9, 152.9, 138.7, 132.8, 130.0, 126.5, 125.6, 124.1, 123.3, 117.5, 115.0, 84.9. These spectral data correspond to previously reported data.<sup>2</sup>

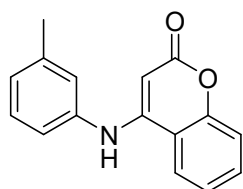

#### 4-(*m*-tolylamino)-2H-chromen-2-one (**1b**)

Synthesis carried out according to the General Procedure, compound **1b** was obtained in 82% yield as a yellowish solid after purification. mp 209–210 °C (lit. mp 212 °C). <sup>1</sup>H NMR (400 MHz, DMSO-*d*<sub>6</sub>)  $\delta$  (ppm): 9.27 (s, 1H), 8.24 (d, *J* = 7.6 Hz, 1H), 7.64 (t, *J* = 7.8 Hz, 1H), 7.41–7.34 (m, 3H), 7.17 (t, *J* = 9.2 Hz, 2H), 7.10 (t, *J* = 7.6 Hz, 1H), 5.31 (s, 1H), 2.35 (s, 3H). <sup>13</sup>C NMR (100 MHz, DMSO-*d*<sub>6</sub>)  $\delta$  (ppm): 162.0, 153.9,

152.9, 139.5, 138.6, 132.8, 129.8, 127.2, 126.0, 124.1, 123.3, 122.6, 117.5, 115.0, 84.8, 21.4. These spectral data correspond to previously reported data.<sup>3</sup>

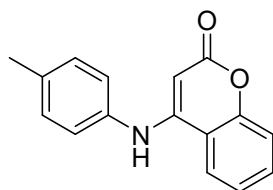

#### 4-(*p*-tolylamino)-2*H*-chromen-2-one (**1c**)

Synthesis carried out according to the General Procedure, compound **1c** was obtained in 79% yield as a yellowish solid after purification. mp 253–254 °C. <sup>1</sup>H NMR (400 MHz, DMSO-*d*<sub>6</sub>) δ (ppm): 9.26 (s, 1H), 8.24 (d, *J* = 8.0 Hz, 1H), 7.65 (t, *J* = 7.8 Hz, 1H), 7.41–7.36 (m, 2H), 7.30–7.24 (m, 4H), 5.22 (s, 1H), 2.34 (s, 3H). <sup>13</sup>C NMR (100 MHz, DMSO-*d*<sub>6</sub>) δ (ppm): 161.9, 153.9, 153.2, 136.0, 135.9, 132.8, 130.5, 125.7, 124.0, 123.2, 117.5, 115.0, 84.4, 21.1. These spectral data correspond to previously reported data.<sup>2</sup>

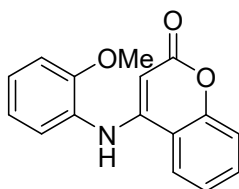

#### 4-((2-methoxyphenyl)amino)-2*H*-chromen-2-one (**1d**)

Synthesis carried out according to the General Procedure, compound **1d** was obtained in 73% yield as a yellowish solid after purification. mp 249–250 °C. <sup>1</sup>H NMR (400 MHz, DMSO-*d*<sub>6</sub>) δ (ppm): 9.07 (s, 1H), 8.27 (d, *J* = 8.0 Hz, 1H), 7.66–7.62 (m, 1H), 7.41–7.36 (m, 3H), 7.33–7.30 (m, 1H), 7.21 (d, *J* = 8.4 Hz, 1H), 7.07 (t, *J* = 7.6 Hz, 1H), 4.75 (s, 1H), 3.80 (s, 3H). <sup>13</sup>C NMR (100 MHz, DMSO-*d*<sub>6</sub>) δ (ppm): 162.0, 155.1, 153.8, 153.7, 132.7, 129.2, 129.0, 126.3, 124.1, 123.3, 121.4, 117.5, 114.9, 113.1, 84.5,

56.1. These spectral data correspond to previously reported data.<sup>2</sup>

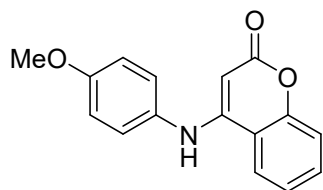

#### 4-((4-methoxyphenyl)amino)-2H-chromen-2-one (**1e**)

Synthesis carried out according to the General Procedure, compound **1e** was obtained in 71% yield as a yellow solid after purification. mp 261–262 °C. <sup>1</sup>H NMR (400 MHz, DMSO-*d*<sub>6</sub>) δ (ppm): 9.22 (s, 1H), 8.23 (d, *J* = 8.0 Hz, 1H), 7.64 (t, *J* = 7.6 Hz, 1H), 7.40–7.34 (m, 2H), 7.29 (d, *J* = 8.8 Hz, 2H), 7.04 (d, *J* = 8.8 Hz, 2H), 5.10 (s, 1H), 3.79 (s, 3H). <sup>13</sup>C NMR (100 MHz, DMSO-*d*<sub>6</sub>) δ (ppm): 162.0, 158.0, 153.9, 153.7, 132.8, 131.1, 127.6, 124.0, 123.2, 117.5, 115.2, 114.9, 84.0, 55.8. These spectral data correspond to previously reported data.<sup>2</sup>

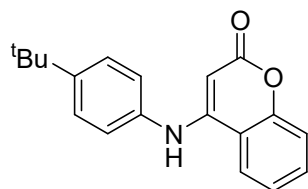

#### 4-((4-(*tert*-butyl)phenyl)amino)-2H-chromen-2-one (**1f**)

Synthesis carried out according to the General Procedure, compound **1f** was obtained in 54% yield as a white solid after purification. mp 243–244 °C (lit. mp 247–248 °C). <sup>1</sup>H NMR (400 MHz, DMSO-*d*<sub>6</sub>) δ (ppm): 9.26 (s, 1H), 8.24 (d, *J* = 7.6 Hz, 1H), 7.65 (t, *J* = 7.6 Hz, 1H), 7.49 (d, *J* = 8.4 Hz, 2H), 7.41–7.36 (m, 2H), 7.29 (d, *J* = 8.4 Hz, 2H), 5.27 (s, 1H), 1.31 (s, 9H). <sup>13</sup>C NMR (100 MHz, DMSO-*d*<sub>6</sub>) δ (ppm): 161.9, 153.9, 153.0, 149.0, 136.0, 132.8, 126.7, 125.2, 124.0, 123.2, 117.5, 115.0, 84.5, 34.8, 31.6. These spectral data correspond to previously reported data.<sup>4</sup>



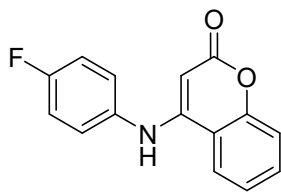

#### 4-((4-fluorophenyl)amino)-2*H*-chromen-2-one (**1g**)

Synthesis carried out according to the General Procedure, compound **1g** was obtained in 61% yield as a yellowish solid after purification. mp >300 °C. <sup>1</sup>H NMR (400 MHz, DMSO-*d*<sub>6</sub>) δ (ppm): 9.29 (s, 1H), 8.22 (d, *J* = 8.0 Hz, 1H), 7.64 (t, *J* = 7.6 Hz, 1H), 7.43–7.37 (m, 4H), 7.35–7.29 (m, 2H), 5.20 (s, 1H). <sup>13</sup>C NMR (100 MHz, DMSO-*d*<sub>6</sub>) δ (ppm): 161.9, 160.4 (*J*<sub>C-F</sub> = 241.8 Hz), 153.9, 153.3, 134.9 (*J*<sub>C-F</sub> = 2.6 Hz), 132.8, 128.0 (*J*<sub>C-F</sub> = 8.5 Hz), 124.1, 123.2, 117.5, 116.8 (*J*<sub>C-F</sub> = 22.4 Hz), 114.9, 84.8. These spectral data correspond to previously reported data.<sup>2</sup>

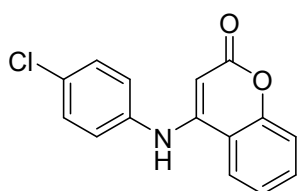

#### 4-((4-chlorophenyl)amino)-2*H*-chromen-2-one (**1h**)

Synthesis carried out according to the General Procedure, compound **1h** was obtained in 66% yield as a yellowish solid after purification. mp >300 °C. <sup>1</sup>H NMR (400 MHz, DMSO-*d*<sub>6</sub>) δ (ppm): 9.33 (s, 1H), 8.21 (d, *J* = 8.0 Hz, 1H), 7.66 (t, *J* = 7.4 Hz, 1H), 7.53 (d, *J* = 8.8 Hz, 2H), 7.42–7.37 (m, 4H), 5.36 (s, 1H). <sup>13</sup>C NMR (100 MHz, DMSO-*d*<sub>6</sub>) δ (ppm): 161.8, 153.8, 152.6, 137.8, 132.9, 130.2, 130.0, 127.0, 124.1, 123.3, 117.5, 114.9, 85.5. These spectral data correspond to previously reported data.<sup>2</sup>

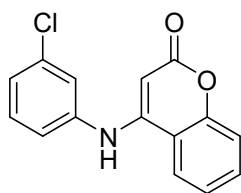

**4-((3-chlorophenyl)amino)-2*H*-chromen-2-one (1i)**

Synthesis carried out according to the General Procedure, compound **1i** was obtained in 69% yield as a yellow solid after purification. mp 259–260 °C. <sup>1</sup>H NMR (400 MHz, DMSO-*d*<sub>6</sub>) δ (ppm): 9.34 (s, 1H), 8.19 (d, *J* = 8.0 Hz, 1H), 7.66 (t, *J* = 7.8 Hz, 1H), 7.51–7.45 (m, 2H), 7.42–7.36 (m, 3H), 7.32 (d, *J* = 8.0 Hz, 1H), 5.34 (s, 1H). <sup>13</sup>C NMR (100 MHz, DMSO-*d*<sub>6</sub>) δ (ppm): 161.8, 153.9, 152.4, 140.5, 134.1, 132.9, 131.6, 125.9, 124.7, 124.1, 123.6, 123.3, 117.5, 114.9, 86.1. HRMS (ESI) *m/z*: Calcd for C<sub>15</sub>H<sub>11</sub>ClNO<sub>2</sub> [M + H]<sup>+</sup>: 272.0473, found 272.0469.

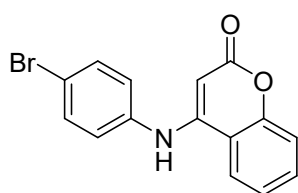

**4-((4-bromophenyl)amino)-2*H*-chromen-2-one (1j)**

Synthesis carried out according to the General Procedure, compound **1j** was obtained in 73% yield as a yellow solid after purification. mp 272–273 °C. <sup>1</sup>H NMR (400 MHz, DMSO-*d*<sub>6</sub>) δ (ppm): 9.31 (s, 1H), 8.21 (d, *J* = 8.0 Hz, 1H), 7.65 (d, *J* = 8.0 Hz, 3H), 7.42–7.34 (m, 4H), 5.38 (s, 1H). <sup>13</sup>C NMR (100 MHz, DMSO-*d*<sub>6</sub>) δ (ppm): 161.8, 153.8, 152.4, 138.3, 132.9, 132.8, 127.2, 124.1, 123.3, 118.3, 117.5, 114.9, 85.6. These spectral data correspond to previously reported data.<sup>2</sup>

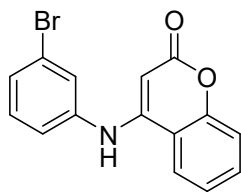

#### 4-((3-bromophenyl)amino)-2*H*-chromen-2-one (**1k**)

Synthesis carried out according to the General Procedure, compound **1k** was obtained in 70% yield as a yellow solid after purification. mp 277–278 °C. <sup>1</sup>H NMR (400 MHz, DMSO-*d*<sub>6</sub>) δ (ppm): 9.34 (s, 1H), 8.19 (d, *J* = 8.0 Hz, 1H), 7.66 (t, *J* = 8.4 Hz, 1H), 7.59 (s, 1H), 7.47–7.37 (m, 5H), 5.42 (s, 1H). <sup>13</sup>C NMR (100 MHz, DMSO-*d*<sub>6</sub>) δ (ppm): 161.8, 153.8, 152.4, 140.6, 133.0, 131.8, 128.8, 127.6, 124.2, 124.0, 123.3, 122.5, 117.5, 114.9, 86.0. HRMS (ESI) *m/z*: Calcd for C<sub>15</sub>H<sub>11</sub>BrNO<sub>2</sub> [M + H]<sup>+</sup>: 315.9968, found 315.9973.

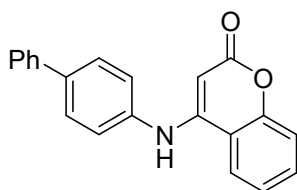

#### 4-([1,1'-biphenyl]-4-ylamino)-2*H*-chromen-2-one (**1l**)

Synthesis carried out according to the General Procedure, compound **1l** was obtained in 62% yield as a yellow solid after purification. mp 328–329 °C (lit. mp 330–331 °C). <sup>1</sup>H NMR (400 MHz, DMSO-*d*<sub>6</sub>) δ (ppm): 9.38 (s, 1H), 8.27 (d, *J* = 7.6 Hz, 1H), 7.79 (d, *J* = 7.6 Hz, 2H), 7.73–7.66 (m, 3H), 7.51–7.38 (m, 7H), 5.44 (s, 1H). <sup>13</sup>C NMR (100 MHz, DMSO-*d*<sub>6</sub>) δ (ppm): 161.9, 153.9, 152.7, 139.8, 138.2, 137.9, 132.9, 129.5, 128.2, 128.0, 127.0, 125.6, 124.1, 123.3, 117.6, 115.0, 85.3. These spectral data correspond to previously reported data.<sup>4</sup>

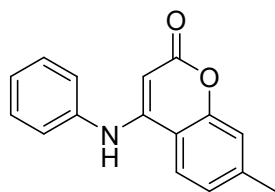

**7-methyl-4-(phenylamino)-2*H*-chromen-2-one (1m)**

Synthesis carried out according to the General Procedure, compound **1m** was obtained in 66% yield as a yellow solid after purification. mp 259–260 °C (lit. mp 253–254 °C).

<sup>1</sup>H NMR (400 MHz, DMSO-*d*<sub>6</sub>) δ (ppm): 9.26 (s, 1H), 8.12 (d, *J* = 8.0 Hz, 1H), 7.48 (t, *J* = 7.8 Hz, 2H), 7.37 (d, *J* = 7.6 Hz, 2H), 7.28 (t, *J* = 7.4 Hz, 1H), 7.23–7.19 (m, 2H), 5.27 (s, 1H), 2.42 (s, 3H). <sup>13</sup>C NMR (100 MHz, DMSO-*d*<sub>6</sub>) δ (ppm): 162.0, 154.0, 153.0, 143.5, 138.8, 130.0, 126.3, 125.5, 125.1, 123.0, 117.5, 112.5, 84.2, 21.4. These spectral data correspond to previously reported data.<sup>4</sup>

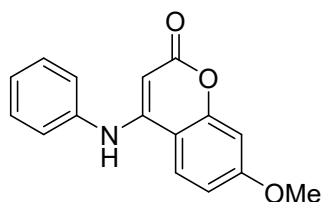

**7-methoxy-4-(phenylamino)-2*H*-chromen-2-one (1n)**

Synthesis carried out according to the General Procedure, compound **1n** was obtained in 69% yield as a yellow solid after purification. mp 262–263 °C. <sup>1</sup>H NMR (400 MHz,

DMSO-*d*<sub>6</sub>) δ (ppm): 9.23 (s, 1H), 8.15 (d, *J* = 8.8 Hz, 1H), 7.48 (t, *J* = 7.4 Hz, 2H), 7.36 (d, *J* = 7.6 Hz, 2H), 7.28 (t, *J* = 7.0 Hz, 1H), 6.99 (d, *J* = 8.4 Hz, 1H), 6.94 (s, 1H), 5.18 (s, 1H), 3.86 (s, 3H). <sup>13</sup>C NMR (100 MHz, DMSO-*d*<sub>6</sub>) δ (ppm): 163.0, 162.3, 155.7, 153.2, 138.8, 130.0, 126.3, 125.5, 124.5, 111.9, 108.1, 101.4, 82.8, 56.3. These spectral data correspond to previously reported data.<sup>5</sup>

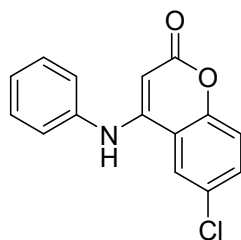

**6-chloro-4-(phenylamino)-2*H*-chromen-2-one (1o)**

Synthesis carried out according to the General Procedure, compound **1o** was obtained in 73% yield as a yellow solid after purification. mp 279–280 °C. <sup>1</sup>H NMR (400 MHz, DMSO-*d*<sub>6</sub>) δ (ppm): 9.36 (s, 1H), 8.40 (d, *J* = 2.0 Hz, 1H), 7.71–7.68 (m, 1H), 7.49 (t, *J* = 7.8 Hz, 2H), 7.42–7.36 (m, 3H), 7.30 (t, *J* = 7.4 Hz, 1H), 5.35 (s, 1H). <sup>13</sup>C NMR (100 MHz, DMSO-*d*<sub>6</sub>) δ (ppm): 161.5, 152.6, 151.9, 138.5, 132.5, 130.1, 128.4, 126.5, 125.3, 123.0, 119.5, 116.5, 85.3. These spectral data correspond to previously reported data.<sup>4</sup>

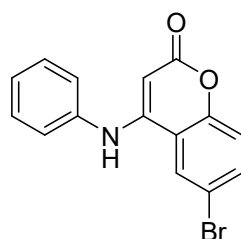

**6-bromo-4-(phenylamino)-2*H*-chromen-2-one (1p)**

Synthesis carried out according to the General Procedure, compound **1p** was obtained in 69% yield as a yellow solid after purification. mp 290–291 °C. <sup>1</sup>H NMR (400 MHz, DMSO-*d*<sub>6</sub>) δ (ppm): 9.35 (s, 1H), 8.51 (d, *J* = 2.0 Hz, 1H), 7.82–7.79 (m, 1H), 7.49 (t, *J* = 7.8 Hz, 2H), 7.36 (t, *J* = 9.2 Hz, 3H), 7.29 (t, *J* = 7.2 Hz, 1H), 5.34 (s, 1H). <sup>13</sup>C NMR (100 MHz, DMSO-*d*<sub>6</sub>) δ (ppm): 161.4, 153.0, 151.8, 138.5, 135.3, 130.0, 126.5, 125.8, 125.3, 119.8, 116.9, 116.1, 85.3. HRMS (ESI) *m/z*: Calcd for C<sub>15</sub>H<sub>11</sub>BrNO<sub>2</sub> [M + H]<sup>+</sup>: 315.9968, found 315.9971.

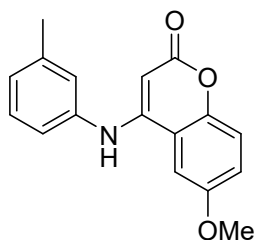

**6-methoxy-4-(*m*-tolylamino)-2*H*-chromen-2-one (1q)**

Synthesis carried out according to the General Procedure, compound **1q** was obtained in 73% yield as a yellowish solid after purification. mp 236–237 °C. <sup>1</sup>H NMR (400 MHz, DMSO-*d*<sub>6</sub>) δ (ppm): 9.22 (s, 1H), 7.75 (s, 1H), 7.39–7.10 (m, 6H), 5.29 (s, 1H), 3.85 (s, 3H), 2.35 (s, 3H). <sup>13</sup>C NMR (100 MHz, DMSO-*d*<sub>6</sub>) δ (ppm): 162.4, 155.9, 152.9, 148.2, 139.7, 138.6, 129.9, 127.3, 126.1, 122.7, 120.4, 118.7, 115.3, 106.0, 85.0, 56.5, 21.5. HRMS (ESI) *m/z*: Calcd for C<sub>17</sub>H<sub>16</sub>NO<sub>3</sub> [M + H]<sup>+</sup>: 282.1125, found 282.1129.

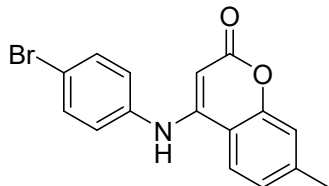

**4-((4-bromophenyl)amino)-7-methyl-2*H*-chromen-2-one (1r)**

Synthesis carried out according to the General Procedure, compound **1r** was obtained in 61% yield as a yellow solid after purification. mp 287–288 °C. <sup>1</sup>H NMR (400 MHz, DMSO-*d*<sub>6</sub>) δ (ppm): 9.27 (s, 1H), 8.09 (d, *J* = 8.0 Hz, 1H), 7.65 (d, *J* = 8.0 Hz, 2H), 7.34 (d, *J* = 8.0 Hz, 2H), 7.25–7.21 (m, 2H), 5.34 (s, 1H), 2.43 (s, 3H). <sup>13</sup>C NMR (100 MHz, DMSO-*d*<sub>6</sub>) δ (ppm): 162.0, 153.9, 152.5, 143.6, 138.3, 132.9, 127.2, 125.2, 123.1, 118.2, 117.5, 112.4, 84.9, 21.5. HRMS (ESI) *m/z*: Calcd for C<sub>16</sub>H<sub>13</sub>BrNO<sub>2</sub> [M + H]<sup>+</sup>: 330.0124, found 330.0129.

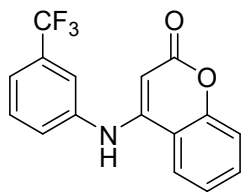

#### 4-((3-(trifluoromethyl)phenyl)amino)-2H-chromen-2-one (1s)

Synthesis carried out according to the General Procedure, compound **1s** was obtained in 61% yield as a yellowish solid after purification. mp 270–271 °C. <sup>1</sup>H NMR (400 MHz, DMSO-*d*<sub>6</sub>) δ (ppm): 9.43 (s, 1H), 8.20 (d, *J* = 8.0 Hz, 1H), 7.73–7.68 (m, 3H), 7.64 (t, *J* = 8.0 Hz, 1H), 7.58 (d, *J* = 7.6 Hz, 1H), 7.41–7.34 (m, 2H), 5.45 (s, 1H). <sup>13</sup>C NMR (100 MHz, DMSO-*d*<sub>6</sub>) δ (ppm): 161.9, 153.9, 152.3, 140.0, 132.9, 131.2, 130.8 (q, *J* = 31.9 Hz), 128.7, 125.7, 124.2, 123.3, 123.0, 122.4 (q, *J* = 3.7 Hz), 121.3 (q, *J* = 3.7 Hz), 117.5, 115.0, 86.2. HRMS (ESI) *m/z*: Calcd for C<sub>16</sub>H<sub>11</sub>F<sub>3</sub>NO<sub>2</sub> [M + H]<sup>+</sup>: 306.0736, found 306.0739.

#### 4.2 Spectral Data of products **2**

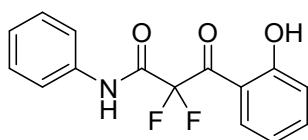

#### 2,2-difluoro-3-(2-hydroxyphenyl)-3-oxo-N-phenylpropanamide (2a)

Synthesis carried out according to the General Procedure, compound **2a** was obtained in 79% yield as a yellowish solid after purification by a silica gel column chromatography. mp 70–71 °C. <sup>1</sup>H NMR (400 MHz, CDCl<sub>3</sub>) δ (ppm): 11.25 (s, 1H), 8.13–8.11 (m, 2H), 7.61–7.57 (m, 3H), 7.37 (t, *J* = 8.0 Hz, 2H), 7.22 (t, *J* = 7.6 Hz, 1H), 7.06–7.04 (m, 1H), 7.00–6.96 (m, 1H). <sup>13</sup>C NMR (100 MHz, CDCl<sub>3</sub>) δ (ppm): 190.4 (*J*<sub>C-F</sub> = 26.6 Hz), 164.3, 158.8 (*J*<sub>C-F</sub> = 27.1 Hz), 138.6, 135.5, 131.7 (*J*<sub>C-F</sub> = 5.8 Hz),

129.3, 126.1, 120.3, 119.8, 118.8, 115.4, 110.5 ( $J_{\text{C-F}} = 265.3$  Hz). HRMS (ESI)  $m/z$ :

Calcd for  $\text{C}_{15}\text{H}_{12}\text{F}_2\text{NO}_3$   $[\text{M} + \text{H}]^+$ : 292.0780, found 292.0783.

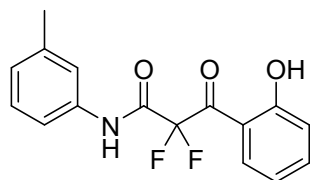

### 2,2-difluoro-3-(2-hydroxyphenyl)-3-oxo-*N*-(*m*-tolyl)propanamide (**2b**)

Synthesis carried out according to the General Procedure, compound **2b** was obtained in 81% yield as a yellow solid after purification by a silica gel column chromatography.

mp 67–68 °C.  $^1\text{H}$  NMR (400 MHz,  $\text{CDCl}_3$ )  $\delta$  (ppm): 11.26 (s, 1H), 8.13–8.11 (m, 1H), 8.07 (s, 1H), 7.60–7.56 (m, 1H), 7.43 (s, 1H), 7.35 (d,  $J = 8.0$  Hz, 1H), 7.25 (t,  $J = 7.8$  Hz, 1H), 7.04 (t,  $J = 7.8$  Hz, 2H), 6.98 (t,  $J = 8.2$  Hz, 1H), 2.35 (s, 3H).  $^{13}\text{C}$  NMR (100 MHz,  $\text{CDCl}_3$ )  $\delta$  (ppm): 190.5 ( $J_{\text{C-F}} = 26.6$  Hz), 164.2, 158.7 ( $J_{\text{C-F}} = 27.2$  Hz), 139.4, 138.6, 135.4, 131.8 ( $J_{\text{C-F}} = 5.9$  Hz), 129.1, 126.9, 120.9, 119.7, 118.8, 117.4, 115.4, 110.5 ( $J_{\text{C-F}} = 265.2$  Hz), 21.4. HRMS (ESI)  $m/z$ : Calcd for  $\text{C}_{16}\text{H}_{14}\text{F}_2\text{NO}_3$   $[\text{M} + \text{H}]^+$ : 306.0936, found 306.0941.

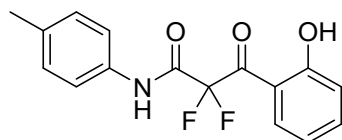

### 2,2-difluoro-3-(2-hydroxyphenyl)-3-oxo-*N*-(*p*-tolyl)propanamide (**2c**)

Synthesis carried out according to the General Procedure, compound **2c** was obtained in 82% yield as a yellowish solid after purification by a silica gel column chromatography. mp 79–80 °C.  $^1\text{H}$  NMR (400 MHz,  $\text{CDCl}_3$ )  $\delta$  (ppm): 11.26 (s, 1H),



8.12–8.10 (m, 2H), 7.60–7.55 (m, 1H), 7.45 (d,  $J = 8.4$  Hz, 2H), 7.16 (d,  $J = 8.0$  Hz, 2H), 7.05–7.03 (m, 1H), 6.99–6.95 (m, 1H), 2.33 (s, 3H).  $^{13}\text{C}$  NMR (100 MHz,  $\text{CDCl}_3$ )  $\delta$  (ppm): 190.5 ( $J_{\text{C-F}} = 26.7$  Hz), 164.2, 158.7 ( $J_{\text{C-F}} = 27.1$  Hz), 138.5, 135.9, 133.0, 131.7 ( $J_{\text{C-F}} = 5.8$  Hz), 129.7, 120.3, 119.7, 118.7, 115.4, 110.5 ( $J_{\text{C-F}} = 265.2$  Hz), 20.9. HRMS (ESI)  $m/z$ : Calcd for  $\text{C}_{16}\text{H}_{14}\text{F}_2\text{NO}_3$   $[\text{M} + \text{H}]^+$ : 306.0936, found 306.0940.

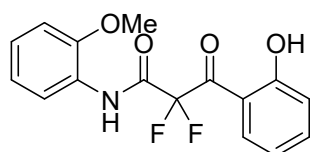

### 2,2-difluoro-3-(2-hydroxyphenyl)-*N*-(2-methoxyphenyl)-3-oxopropanamide (**2d**)

Synthesis carried out according to the General Procedure, compound **2d** was obtained in 78% yield as a yellow solid after purification by a silica gel column chromatography. mp 79–80 °C.  $^1\text{H}$  NMR (400 MHz,  $\text{CDCl}_3$ )  $\delta$  (ppm): 11.29 (s, 1H), 8.75 (s, 1H), 8.32–8.30 (m, 1H), 8.13–8.10 (m, 1H), 7.60–7.56 (m, 1H), 7.17–7.13 (m, 1H), 7.05 (d,  $J = 8.0$  Hz, 1H), 6.98 (t,  $J = 7.2$  Hz, 2H), 6.93 (d,  $J = 8.4$  Hz, 1H), 3.94 (s, 3H).  $^{13}\text{C}$  NMR (100 MHz,  $\text{CDCl}_3$ )  $\delta$  (ppm): 190.5 ( $J_{\text{C-F}} = 26.6$  Hz), 164.2, 158.4 ( $J_{\text{C-F}} = 27.0$  Hz), 148.3, 138.5, 131.7 ( $J_{\text{C-F}} = 5.7$  Hz), 125.7, 125.4, 121.1, 120.1, 119.7, 118.8, 115.5, 110.4 ( $J_{\text{C-F}} = 265.1$  Hz), 110.2, 55.9. HRMS (ESI)  $m/z$ : Calcd for  $\text{C}_{16}\text{H}_{14}\text{F}_2\text{NO}_4$   $[\text{M} + \text{H}]^+$ : 322.0885, found 322.0890.

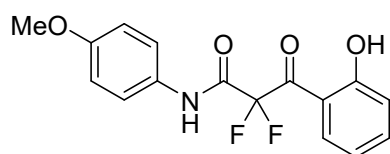

### 2,2-difluoro-3-(2-hydroxyphenyl)-*N*-(4-methoxyphenyl)-3-oxopropanamide (**2e**)

Synthesis carried out according to the General Procedure, compound **2e** was obtained in 87% yield as a yellow solid after purification by a silica gel column chromatography. mp 112–113 °C. <sup>1</sup>H NMR (400 MHz, CDCl<sub>3</sub>) δ (ppm): 11.26 (s, 1H), 8.13–8.11 (m, 1H), 8.03 (s, 1H), 7.60–7.56 (m, 1H), 7.48 (d, *J* = 9.2 Hz, 2H), 7.04 (d, *J* = 8.4 Hz, 2H), 6.98 (t, *J* = 7.8 Hz, 1H), 6.88 (d, *J* = 9.2 Hz, 2H), 3.80 (s, 3H). <sup>13</sup>C NMR (100 MHz, CDCl<sub>3</sub>) δ (ppm): 190.5 (*J*<sub>C-F</sub> = 26.7 Hz), 164.2, 158.6 (*J*<sub>C-F</sub> = 27.0 Hz), 157.6, 138.6, 131.8 (*J*<sub>C-F</sub> = 5.8 Hz), 128.5, 122.1, 119.7, 118.8, 118.7, 115.4, 114.4, 110.6 (*J*<sub>C-F</sub> = 26.9 Hz). HRMS (ESI) *m/z*: Calcd for C<sub>16</sub>H<sub>14</sub>F<sub>2</sub>NO<sub>4</sub> [M + H]<sup>+</sup>: 322.0885, found 322.0891.

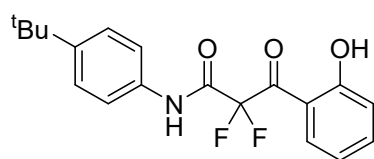

***N*-(4-(*tert*-butyl)phenyl)-2,2-difluoro-3-(2-hydroxyphenyl)-3-oxopropanamide (**2f**)**

Synthesis carried out according to the General Procedure, compound **2f** was obtained in 85% yield as a yellow oil after purification by a silica gel column chromatography. <sup>1</sup>H NMR (400 MHz, CDCl<sub>3</sub>) δ (ppm): 11.25 (s, 1H), 8.13–8.10 (m, 1H), 8.06 (s, 1H), 7.58 (t, *J* = 7.2 Hz, 1H), 7.51 (d, *J* = 8.8 Hz, 2H), 7.39 (d, *J* = 8.8 Hz, 2H), 7.05 (d, *J* = 8.4 Hz, 1H), 6.98 (t, *J* = 7.8 Hz, 1H), 1.31 (s, 9H). <sup>13</sup>C NMR (100 MHz, CDCl<sub>3</sub>) δ (ppm): 190.5 (*J*<sub>C-F</sub> = 26.5 Hz), 164.2, 158.7 (*J*<sub>C-F</sub> = 27.2 Hz), 149.3, 138.6, 132.9, 131.8 (*J*<sub>C-F</sub> = 5.8 Hz), 126.1, 120.0, 119.7, 118.8, 115.4, 110.5 (*J*<sub>C-F</sub> = 26.1 Hz), 34.5, 31.2. HRMS (ESI) *m/z*: Calcd for C<sub>19</sub>H<sub>20</sub>F<sub>2</sub>NO<sub>3</sub> [M + H]<sup>+</sup>: 348.1406, found 348.1411.

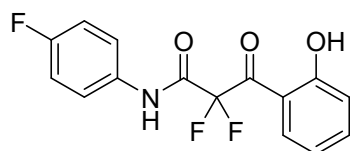

**2,2-difluoro-N-(4-fluorophenyl)-3-(2-hydroxyphenyl)-3-oxopropanamide (2g)**

Synthesis carried out according to the General Procedure, compound **2g** was obtained in 73% yield as a yellowish solid after purification by a silica gel column chromatography. mp 100–101 °C. <sup>1</sup>H NMR (400 MHz, CDCl<sub>3</sub>) δ (ppm): 11.22 (s, 1H), 8.17 (s, 1H), 8.11–8.09 (m, 1H), 7.61–7.53 (m, 3H), 7.06 (t, *J* = 8.4 Hz, 3H), 6.98 (t, *J* = 7.2 Hz, 1H). <sup>13</sup>C NMR (100 MHz, CDCl<sub>3</sub>) δ (ppm): 190.3 (*J*<sub>C-F</sub> = 26.6 Hz), 164.3, 161.5, 159.1, 158.9 (*J*<sub>C-F</sub> = 27.3 Hz), 138.7, 131.7 (*J*<sub>C-F</sub> = 5.9 Hz), 131.5 (*J*<sub>C-F</sub> = 3.0 Hz), 122.3 (*J*<sub>C-F</sub> = 8.1 Hz), 119.8, 118.8, 116.1 (*J*<sub>C-F</sub> = 22.6 Hz), 115.3, 110.6 (*J*<sub>C-F</sub> = 265.3 Hz). HRMS (ESI) *m/z*: Calcd for C<sub>15</sub>H<sub>11</sub>F<sub>3</sub>NO<sub>3</sub> [M + H]<sup>+</sup>: 310.0686, found 310.0690.

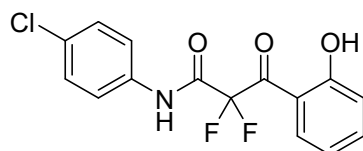

**N-(4-chlorophenyl)-2,2-difluoro-3-(2-hydroxyphenyl)-3-oxopropanamide (2h)**

Synthesis carried out according to the General Procedure, compound **2h** was obtained in 75% yield as a yellowish solid after purification by a silica gel column chromatography. mp 95–96 °C. <sup>1</sup>H NMR (400 MHz, CDCl<sub>3</sub>) δ (ppm): 11.21 (s, 1H), 8.15 (s, 1H), 8.10–8.08 (m, 1H), 7.61–7.57 (m, 1H), 7.53 (d, *J* = 8.8 Hz, 2H), 7.33 (d, *J* = 8.8 Hz, 2H), 7.04 (d, *J* = 8.4 Hz, 1H), 6.98 (t, *J* = 7.8 Hz, 1H). <sup>13</sup>C NMR (100 MHz, CDCl<sub>3</sub>) δ (ppm): 190.2 (*J*<sub>C-F</sub> = 26.5 Hz), 164.3, 158.9 (*J*<sub>C-F</sub> = 27.5 Hz), 138.8, 134.1, 131.6 (*J*<sub>C-F</sub> = 6.0 Hz), 131.3, 129.3, 121.6, 119.8, 118.8, 115.3, 110.5 (*J*<sub>C-F</sub> = 265.5 Hz).

HRMS (ESI)  $m/z$ : Calcd for  $C_{15}H_{11}ClF_2NO_3$   $[M + H]^+$ : 326.0390, found 326.0396.

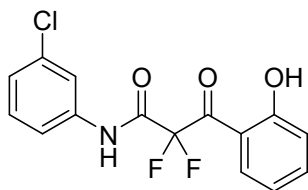

***N*-(3-chlorophenyl)-2,2-difluoro-3-(2-hydroxyphenyl)-3-oxopropanamide (2i)**

Synthesis carried out according to the General Procedure, compound **2i** was obtained in 73% yield as a yellow solid after purification by a silica gel column chromatography. mp 89–90 °C.  $^1H$  NMR (400 MHz,  $CDCl_3$ )  $\delta$  (ppm): 11.21 (s, 1H), 8.17 (s, 1H), 8.11–8.09 (m, 1H), 7.71 (t,  $J = 2.0$  Hz, 1H), 7.62–7.57 (m, 1H), 7.44–7.41 (m, 1H), 7.30 (t,  $J = 8.0$  Hz, 1H), 7.20–7.18 (m, 1H), 7.07–7.04 (m, 1H), 7.01–6.97 (m, 1H).  $^{13}C$  NMR (100 MHz,  $CDCl_3$ )  $\delta$  (ppm): 190.2 ( $J_{C-F} = 26.6$  Hz), 164.3, 158.9 ( $J_{C-F} = 27.4$  Hz), 138.8, 136.7, 135.0, 131.7 ( $J_{C-F} = 6.0$  Hz), 130.3, 126.2, 120.5, 119.8, 118.9, 118.3, 115.3, 110.5 ( $J_{C-F} = 265.4$  Hz). HRMS (ESI)  $m/z$ : Calcd for  $C_{15}H_{11}ClF_2NO_3$   $[M + H]^+$ : 326.0390, found 326.0395.

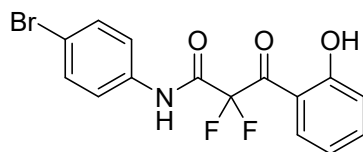

***N*-(4-bromophenyl)-2,2-difluoro-3-(2-hydroxyphenyl)-3-oxopropanamide (2j)**

Synthesis carried out according to the General Procedure, compound **2j** was obtained in 79% yield as a yellow solid after purification by a silica gel column chromatography. mp 95–96 °C.  $^1H$  NMR (400 MHz,  $CDCl_3$ )  $\delta$  (ppm): 11.21 (s, 1H), 8.12–8.09 (m, 2H), 7.62–7.58 (m, 1H), 7.49 (s, 4H), 7.05 (d,  $J = 8.4$  Hz, 1H), 6.99 (t,  $J = 7.8$  Hz, 1H).  $^{13}C$

NMR (100 MHz, CDCl<sub>3</sub>)  $\delta$  (ppm): 190.3 ( $J_{\text{C-F}} = 26.6$  Hz), 164.3, 158.8 ( $J_{\text{C-F}} = 27.3$  Hz), 138.8, 134.6, 132.3, 131.7 ( $J_{\text{C-F}} = 6.0$  Hz), 121.8, 119.8, 119.0, 118.9, 115.3, 110.5 ( $J_{\text{C-F}} = 265.4$  Hz). HRMS (ESI)  $m/z$ : Calcd for C<sub>15</sub>H<sub>11</sub>BrF<sub>2</sub>NO<sub>3</sub> [M + H]<sup>+</sup>: 369.9885, found 369.9890.

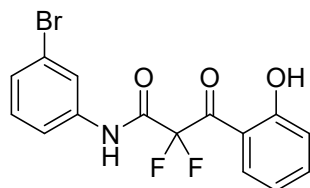

***N*-(3-bromophenyl)-2,2-difluoro-3-(2-hydroxyphenyl)-3-oxopropanamide (2k)**

Synthesis carried out according to the General Procedure, compound **2k** was obtained in 77% yield as a yellow solid after purification by a silica gel column chromatography. mp 75–76 °C. <sup>1</sup>H NMR (400 MHz, CDCl<sub>3</sub>)  $\delta$  (ppm): 11.21 (s, 1H), 8.10 (d,  $J = 8.4$  Hz, 2H), 7.85 (s, 1H), 7.60 (t,  $J = 7.8$  Hz, 1H), 7.49–7.47 (m, 1H), 7.35 (d,  $J = 8.0$  Hz, 1H), 7.23 (t,  $J = 8.0$  Hz, 1H), 7.05 (d,  $J = 8.4$  Hz, 1H), 6.99 (t,  $J = 7.8$  Hz, 1H). <sup>13</sup>C NMR (100 MHz, CDCl<sub>3</sub>)  $\delta$  (ppm): 190.2 ( $J_{\text{C-F}} = 26.6$  Hz), 164.3, 158.9 ( $J_{\text{C-F}} = 27.9$  Hz), 138.8, 136.7, 131.7 ( $J_{\text{C-F}} = 5.9$  Hz), 130.5, 129.1, 123.3, 122.9, 119.8, 118.9, 118.8, 115.3, 110.5 ( $J_{\text{C-F}} = 265.5$  Hz). HRMS (ESI)  $m/z$ : Calcd for C<sub>15</sub>H<sub>11</sub>BrF<sub>2</sub>NO<sub>3</sub> [M + H]<sup>+</sup>: 369.9885, found 369.9891.

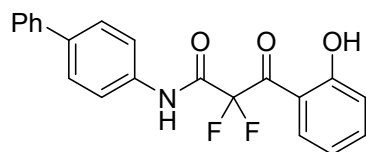

***N*-([1,1'-biphenyl]-4-yl)-2,2-difluoro-3-(2-hydroxyphenyl)-3-oxopropanamide (2l)**

Synthesis carried out according to the General Procedure, compound **2l** was obtained

in 79% yield as a yellow solid after purification by a silica gel column chromatography. mp 125–126 °C. <sup>1</sup>H NMR (400 MHz, CDCl<sub>3</sub>) δ (ppm): 11.26 (s, 1H), 8.14 (d, *J* = 6.8 Hz, 2H), 7.66 (d, *J* = 8.8 Hz, 2H), 7.62–7.56 (m, 5H), 7.44 (t, *J* = 7.6 Hz, 2H), 7.36 (t, *J* = 7.4 Hz, 1H), 7.06 (d, *J* = 8.4 Hz, 1H), 7.00 (t, *J* = 7.8 Hz, 1H). <sup>13</sup>C NMR (100 MHz, CDCl<sub>3</sub>) δ (ppm): 190.4 (*J*<sub>C-F</sub> = 26.5 Hz), 164.3, 158.8 (*J*<sub>C-F</sub> = 27.6 Hz), 140.0, 139.0, 138.7, 134.8, 131.8 (*J*<sub>C-F</sub> = 5.7 Hz), 128.9, 127.9, 127.5, 126.9, 120.6, 119.8, 118.8, 115.4, 110.5 (*J*<sub>C-F</sub> = 265.2 Hz). HRMS (ESI) *m/z*: Calcd for C<sub>21</sub>H<sub>16</sub>F<sub>2</sub>NO<sub>3</sub> [M + H]<sup>+</sup>: 368.1093, found 368.1099.

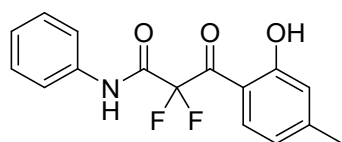

### **2,2-difluoro-3-(2-hydroxy-4-methylphenyl)-3-oxo-N-phenylpropanamide (2m)**

Synthesis carried out according to the General Procedure, compound **2m** was obtained in 73% yield as a yellow solid after purification by a silica gel column chromatography. mp 89–90 °C. <sup>1</sup>H NMR (400 MHz, CDCl<sub>3</sub>) δ (ppm): 11.32 (s, 1H), 8.14 (s, 1H), 7.99 (d, *J* = 8.4 Hz, 1H), 7.57 (d, *J* = 7.6 Hz, 2H), 7.36 (t, *J* = 7.8 Hz, 2H), 7.21 (t, *J* = 7.4 Hz, 1H), 6.85 (s, 1H), 6.78 (d, *J* = 8.4 Hz, 1H), 2.37 (s, 3H). <sup>13</sup>C NMR (100 MHz, CDCl<sub>3</sub>) δ (ppm): 189.6 (*J*<sub>C-F</sub> = 26.5 Hz), 164.5, 158.9 (*J*<sub>C-F</sub> = 27.4 Hz), 151.0, 135.6, 131.5 (*J*<sub>C-F</sub> = 5.9 Hz), 129.2, 126.0, 121.3, 120.3, 118.7, 115.1, 110.6 (*J*<sub>C-F</sub> = 266.1 Hz), 22.2. HRMS (ESI) *m/z*: Calcd for C<sub>16</sub>H<sub>14</sub>F<sub>2</sub>NO<sub>3</sub> [M + H]<sup>+</sup>: 306.0936, found 306.0941.

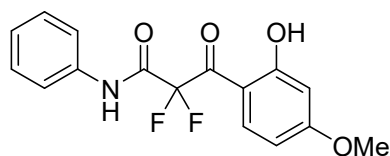

### 2,2-difluoro-3-(2-hydroxy-4-methoxyphenyl)-3-oxo-*N*-phenylpropanamide (**2n**)

Synthesis carried out according to the General Procedure, compound **2n** was obtained in 69% yield as a yellowish solid after purification by a silica gel column chromatography. mp 69–70 °C. <sup>1</sup>H NMR (400 MHz, CDCl<sub>3</sub>) δ (ppm): 11.81 (s, 1H), 8.15 (s, 1H), 8.05 (d, *J* = 9.2 Hz, 1H), 7.57 (d, *J* = 8.0 Hz, 2H), 7.35 (t, *J* = 7.8 Hz, 2H), 7.20 (t, *J* = 7.4 Hz, 1H), 6.52–6.50 (m, 1H), 6.45 (d, *J* = 2.4 Hz, 1H), 3.86 (s, 3H). <sup>13</sup>C NMR (100 MHz, CDCl<sub>3</sub>) δ (ppm): 188.0 (*J*<sub>C-F</sub> = 26.4 Hz), 168.0, 167.7, 159.1 (*J*<sub>C-F</sub> = 27.3 Hz), 135.7, 133.6 (*J*<sub>C-F</sub> = 6.3 Hz), 129.2, 125.9, 120.3, 110.7 (*J*<sub>C-F</sub> = 264.3 Hz), 109.6, 109.2, 101.0, 55.8. HRMS (ESI) *m/z*: Calcd for C<sub>16</sub>H<sub>14</sub>F<sub>2</sub>NO<sub>4</sub> [*M* + *H*]<sup>+</sup>: 322.0885, found 322.0891.

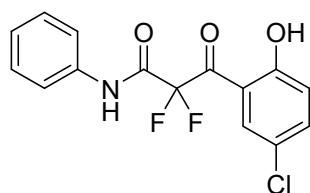

### 3-(5-chloro-2-hydroxyphenyl)-2,2-difluoro-3-oxo-*N*-phenylpropanamide (**2o**)

Synthesis carried out according to the General Procedure, compound **2o** was obtained in 61% yield as a yellow solid after purification by a silica gel column chromatography. mp 100–101 °C. <sup>1</sup>H NMR (400 MHz, CDCl<sub>3</sub>) δ (ppm): 11.16 (s, 1H), 8.12 (s, 1H), 8.04 (s, 1H), 7.58 (d, *J* = 8.0 Hz, 2H), 7.55–7.53 (m, 1H), 7.39 (t, *J* = 8.0 Hz, 2H), 7.24 (t, *J* = 7.2 Hz, 1H), 7.02 (d, *J* = 9.2 Hz, 1H). <sup>13</sup>C NMR (100 MHz, CDCl<sub>3</sub>) δ (ppm): 190.1

( $J_{\text{C-F}} = 27.0$  Hz), 162.8, 158.4 ( $J_{\text{C-F}} = 26.9$  Hz), 138.7, 135.4, 130.8 ( $J_{\text{C-F}} = 6.5$  Hz), 129.4, 126.3, 124.7, 120.4, 118.7, 116.0, 110.3 ( $J_{\text{C-F}} = 265.7$  Hz). HRMS (ESI)  $m/z$ : Calcd for  $\text{C}_{15}\text{H}_{11}\text{ClF}_2\text{NO}_3$   $[\text{M} + \text{H}]^+$ : 326.0390, found 326.0397.

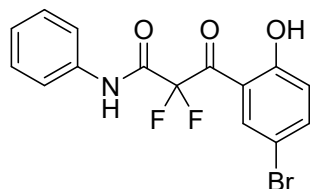

### 3-(5-bromo-2-hydroxyphenyl)-2,2-difluoro-3-oxo-*N*-phenylpropanamide (**2p**)

Synthesis carried out according to the General Procedure, compound **2p** was obtained in 63% yield as a yellow oil after purification by a silica gel column chromatography.

$^1\text{H}$  NMR (400 MHz,  $\text{CDCl}_3$ )  $\delta$  (ppm): 11.18 (s, 1H), 8.25 (s, 1H), 8.12 (s, 1H), 7.58 (d,  $J = 8.0$  Hz, 2H), 7.39 (t,  $J = 7.8$  Hz, 2H), 7.23 (t,  $J = 7.6$  Hz, 2H), 6.97 (d,  $J = 9.2$  Hz, 1H).  $^{13}\text{C}$  NMR (100 MHz,  $\text{CDCl}_3$ )  $\delta$  (ppm): 190.0 ( $J_{\text{C-F}} = 27.1$  Hz), 163.2, 158.5 ( $J_{\text{C-F}} = 27.0$  Hz), 141.3, 137.0, 135.4, 133.9 ( $J_{\text{C-F}} = 6.4$  Hz), 129.3, 126.3, 120.5, 118.8, 116.6, 110.3 ( $J_{\text{C-F}} = 265.7$  Hz). HRMS (ESI)  $m/z$ : Calcd for  $\text{C}_{15}\text{H}_{11}\text{BrF}_2\text{NO}_3$   $[\text{M} + \text{H}]^+$ : 369.9885, found 369.9889.

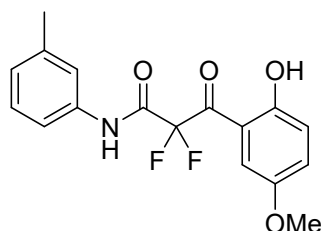

### 2,2-difluoro-3-(2-hydroxy-5-methoxyphenyl)-3-oxo-*N*-(*m*-tolyl)propanamide (**2q**)

Synthesis carried out according to the General Procedure, compound **2q** was obtained in 82% yield as a yellow oil after purification by a silica gel column chromatography.



$^1\text{H}$  NMR (400 MHz,  $\text{CDCl}_3$ )  $\delta$  (ppm): 10.98 (s, 1H), 7.98 (s, 1H), 7.60 (s, 1H), 7.41 (s, 1H), 7.36–7.32 (m, 1H), 7.30–7.22 (m, 3H), 7.03 (d,  $J = 7.2$  Hz, 1H), 6.99 (d,  $J = 9.2$  Hz, 1H), 3.82 (s, 3H), 2.36 (s, 3H).  $^{13}\text{C}$  NMR (100 MHz,  $\text{CDCl}_3$ )  $\delta$  (ppm): 189.9 ( $J_{\text{C-F}} = 26.3$  Hz), 159.3, 158.7 ( $J_{\text{C-F}} = 27.3$  Hz), 152.1, 139.4, 135.5, 129.1, 128.2, 126.9, 120.9, 119.7, 117.4, 114.7, 112.6 ( $J_{\text{C-F}} = 5.6$  Hz), 110.6 ( $J_{\text{C-F}} = 264.8$  Hz), 55.9, 21.4. HRMS (ESI)  $m/z$ : Calcd for  $\text{C}_{17}\text{H}_{16}\text{F}_2\text{NO}_4$   $[\text{M} + \text{H}]^+$ : 336.1042, found 336.1050.

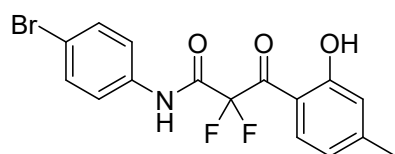

***N*-(4-bromophenyl)-2,2-difluoro-3-(2-hydroxy-4-methylphenyl)-3-oxopropanamide (2r)**

Synthesis carried out according to the General Procedure, compound **2r** was obtained in 71% yield as a yellow solid after purification by a silica gel column chromatography. mp 95–96 °C.  $^1\text{H}$  NMR (400 MHz,  $\text{CDCl}_3$ )  $\delta$  (ppm): 11.27 (s, 1H), 8.07 (s, 1H), 7.97 (d,  $J = 8.4$  Hz, 1H), 7.48 (s, 4H), 6.85 (s, 1H), 6.79 (d,  $J = 8.4$  Hz, 1H), 2.38 (s, 3H).  $^{13}\text{C}$  NMR (100 MHz,  $\text{CDCl}_3$ )  $\delta$  (ppm): 189.4 ( $J_{\text{C-F}} = 26.5$  Hz), 164.6, 159.0 ( $J_{\text{C-F}} = 27.4$  Hz), 151.2, 134.7, 132.3, 131.5 ( $J_{\text{C-F}} = 6.0$  Hz), 121.8, 121.3, 118.9, 118.8, 116.7, 110.6 ( $J_{\text{C-F}} = 263.3$  Hz), 22.3. HRMS (ESI)  $m/z$ : Calcd for  $\text{C}_{16}\text{H}_{13}\text{BrF}_2\text{NO}_3$   $[\text{M} + \text{H}]^+$ : 384.0041, found 384.0045.

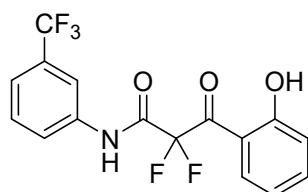

**2,2-difluoro-3-(2-hydroxyphenyl)-3-oxo-N-(3-(trifluoromethyl)phenyl)propanamide (2s)**

Synthesis carried out according to the General Procedure, compound **2s** was obtained in 29% yield as a yellow oil after purification by a silica gel column chromatography..

$^1\text{H}$  NMR (400 MHz,  $\text{CDCl}_3$ )  $\delta$  (ppm): 11.20 (s, 1H), 8.39 (s, 1H), 8.11–8.09 (m, 1H), 7.91 (s, 1H), 7.79 (d,  $J = 7.6$  Hz, 1H), 7.62–7.57 (m, 1H), 7.53–7.46 (m, 2H), 7.05 (d,  $J = 7.6$  Hz, 1H), 6.99 (t,  $J = 7.8$  Hz, 1H).  $^{13}\text{C}$  NMR (100 MHz,  $\text{CDCl}_3$ )  $\delta$  (ppm): 190.2 ( $J_{\text{C-F}} = 26.6$  Hz), 164.4, 159.2 ( $J_{\text{C-F}} = 27.5$  Hz), 138.8, 136.2, 133.8, 131.8 ( $J_{\text{C-F}} = 32.7$  Hz), 131.6 ( $J_{\text{C-F}} = 5.9$  Hz), 129.9, 123.4, 122.7 ( $J_{\text{C-F}} = 3.7$  Hz), 119.8, 118.9, 117.2 ( $J_{\text{C-F}} = 3.8$  Hz), 115.3, 110.5 ( $J_{\text{C-F}} = 265.7$  Hz). HRMS (ESI)  $m/z$ : Calcd for  $\text{C}_{16}\text{H}_{11}\text{F}_5\text{NO}_3$   $[\text{M} + \text{H}]^+$ : 360.0654, found 360.0657.

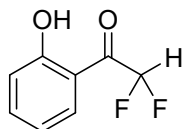

**2,2-difluoro-1-(2-hydroxyphenyl)ethan-1-one (3)**

Synthesis carried out according to the General Procedure, compound **3** was obtained in 31% yield as a yellow oil after purification by a silica gel column chromatography.  $^1\text{H}$  NMR (400 MHz,  $\text{CDCl}_3$ )  $\delta$  (ppm): 11.29 (s, 1H), 7.90–7.88 (m, 1H), 7.59 (t,  $J = 7.4$  Hz, 1H), 7.06 (d,  $J = 8.4$  Hz, 1H), 6.99 (t,  $J = 7.6$  Hz, 1H), 6.33 (t,  $J = 53.2$  Hz, 1H).  $^{13}\text{C}$  NMR (100 MHz,  $\text{CDCl}_3$ )  $\delta$  (ppm): 191.6 ( $J_{\text{C-F}} = 25.0$  Hz), 164.0, 138.3, 130.4 ( $J_{\text{C-F}} = 4.3$  Hz), 119.7, 118.9, 115.3, 110.8 ( $J_{\text{C-F}} = 251.8$  Hz). HRMS (ESI)  $m/z$ : Calcd for  $\text{C}_8\text{H}_7\text{F}_2\text{O}_2$   $[\text{M} + \text{H}]^+$ : 173.0409, found 173.0413.

## References

- [1] E. V. Stoyanov, I. C. Ivanov, Convenient Replacement of the Hydroxy by an Amino Group in 4-Hydroxycoumarin and 4-Hydroxy-6-methyl-2-pyrone under Microwave Irradiation, *Molecules* 2004, **9**, 627–631.
- [2] C. Cheng, W.-W. Chen, B. Xu, M.-H. Xu, Access to Indole-Fused Polyheterocycles via Pd-Catalyzed Base-Free Intramolecular Cross Dehydrogenative Coupling. *J. Org. Chem.* 2016, **81**, 11501–11507.
- [3] S. Paul, K. Pradhan, S. Ghosh, S. K. De, A. R. Das, Magnetically Retrievable Nano Crystalline Nickel Ferrite-Catalyzed Aerobic, Ligand-Free C–N, C–O and C–C Cross-Coupling Reactions for the Synthesis of a Diversified Library of Heterocyclic Molecules. *Adv. Synth. Catal.* 2014, **356**, 1301–1316.
- [4] Y. Y. Weng, H. T. Chen, N. H. Li, L. Yang, L. Ackermann, Electrooxidative Metal-Free Cyclization of 4-Arylamino coumarins with DMF as C1-Source. *Adv. Synth. Catal.* 2021, **363**, 1–6.
- [5] C. Cheng, W.-W. Chen, B. Xu, M.-H. Xu, Intramolecular Cross Dehydrogenative Coupling of 4-substituted Coumarins: Rapid and Efficient Access to Coumestans and Indole[3,2-c]coumarins. *Org. Chem. Front.* 2016, **3**, 1111–1115.
- [6] P.-X. Gong, B.-K. Wang, Y.-C. Wu, Q.-Y. Li, B.-W. Qin, H.-J. Li, Release of Antidiabetic Peptides from *Stichopus Japonicas* by Simulated Gastrointestinal Digestion. *Food Chem.* 2020, **315**, 126273.
- [7] P.-X. Gong, Q.-Y. Li, Y.-C. Wu, W.-Y. Lu, J. Zeng, H.-J. Li, Structural Elucidation and Antidiabetic Activity of Fucosylated Chondroitin Sulfate from Sea Cucumber *Stichopus Japonicas*. *Carbohydr. Polym.* 2021, **262**, 117969.

## 5. X-ray Crystallographic Data for 2a

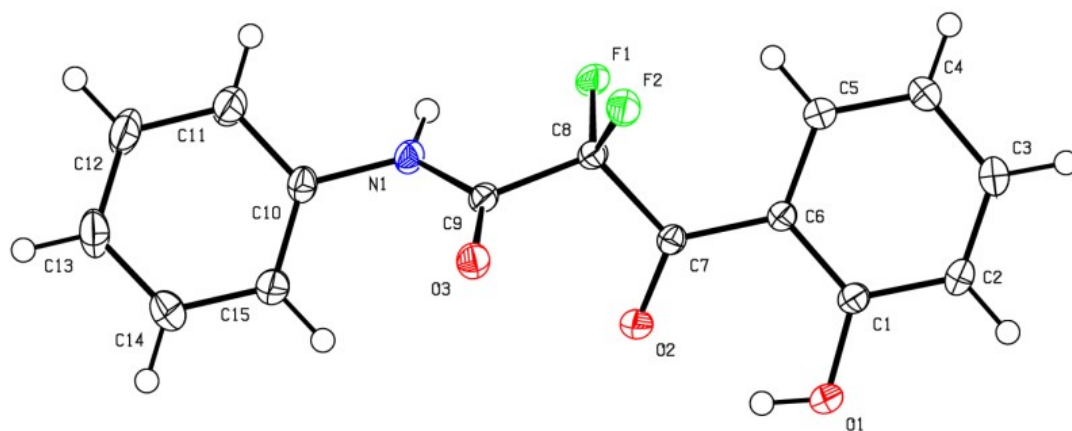

**Figure S1.** X-Ray crystal structure of **2a**

**Table 1.** Crystal Data and Structure Refinement for **2a**

|                        |                                                                                                    |
|------------------------|----------------------------------------------------------------------------------------------------|
| CCDC number            | 2084177                                                                                            |
| Identification code    | r20210507a                                                                                         |
| Empirical formula      | C <sub>15</sub> H <sub>11</sub> F <sub>2</sub> N O <sub>3</sub>                                    |
| Formula weight         | 291.25                                                                                             |
| Temperature            | 113.15 K                                                                                           |
| Wavelength             | 0.71073                                                                                            |
| Crystal system         | Monoclinic                                                                                         |
| Space group            | P2 <sub>1</sub> /n                                                                                 |
| Unit cell dimensions   | a = 5.1636(2) Å    α = 90°.<br>b = 17.4283(6) Å    β = 95.475(4)°.<br>c = 14.1357(5) Å    γ = 90°. |
| Volume                 | 1266.31(8) Å <sup>3</sup>                                                                          |
| Z                      | 4                                                                                                  |
| Density (calculated)   | 1.528 g/cm <sup>3</sup>                                                                            |
| Absorption coefficient | 0.126 mm <sup>-1</sup>                                                                             |
| F(000)                 | 600.0                                                                                              |

|                                         |                                                               |
|-----------------------------------------|---------------------------------------------------------------|
| Theta range for data collection         | 3.72 to 65.68°                                                |
| Index ranges                            | $-7 \leq h \leq 7, -25 \leq k \leq 26, -19 \leq l \leq 20$    |
| Reflections collected                   | 15726                                                         |
| Independent reflections                 | 4361 [ $R_{\text{int}} = 0.0648, R_{\text{sigma}} = 0.0519$ ] |
| Max. and min. transmission              | 1.000 and 0.613                                               |
| Data / restraints / parameters          | 4361/0/192                                                    |
| Goodness-of-fit on $F^2$                | 1.039                                                         |
| Final R indices [ $I \geq 2\sigma(I)$ ] | $R_1 = 0.0513, wR_2 = 0.1258$                                 |
| R indices (all data)                    | $R_1 = 0.0698, wR_2 = 0.1444$                                 |
| Largest diff. peak and hole             | 0.43 and -0.28 e $\text{\AA}^{-3}$                            |

**Table 2.** Fractional Atomic Coordinates ( $\times 10^4$ ) and Equivalent Isotropic

Displacement Parameters ( $\text{\AA}^2 \times 10^3$ ) for r20210507a.  $U(\text{eq})$  is defined as 1/3 of the

trace of the orthogonalised  $U^{\text{U}}$  tensor.

| Atom | $x$        | $y$        | $z$        | $U(\text{eq})$ |
|------|------------|------------|------------|----------------|
| F1   | 7438.3(16) | 6205.9(5)  | 4059.1(6)  | 22.0(2)        |
| F2   | 4146.2(18) | 6926.0(4)  | 3522.1(6)  | 22.6(2)        |
| O1   | 113(2)     | 5938.7(6)  | 6255.7(8)  | 23.7(2)        |
| O2   | 2353(2)    | 5408.1(5)  | 4775.5(7)  | 20.6(2)        |
| O3   | 1683.8(19) | 5633.0(6)  | 2711.8(7)  | 21.2(2)        |
| N1   | 5945(2)    | 5264.1(6)  | 2672.4(8)  | 18.4(2)        |
| C1   | 1835(3)    | 6518.6(7)  | 6226.5(10) | 18.1(3)        |
| C2   | 1885(3)    | 7060.2(8)  | 6958.5(10) | 24.3(3)        |
| C3   | 3613(3)    | 7665.4(8)  | 6987.6(11) | 24.0(3)        |
| C4   | 5312(3)    | 7755.8(8)  | 6286.3(10) | 22.4(3)        |
| C5   | 5255(3)    | 7234.3(8)  | 5549.1(10) | 20.2(3)        |
| C6   | 3517(3)    | 6604.0(7)  | 5501.7(9)  | 16.0(2)        |
| C7   | 3454(3)    | 6029.1(7)  | 4745.0(9)  | 15.5(2)        |
| C8   | 4805(3)    | 6204.1(7)  | 3836.9(9)  | 16.0(2)        |
| C9   | 3987(3)    | 5651.0(7)  | 3009.7(9)  | 15.9(2)        |
| C10  | 5600(3)    | 4736.8(8)  | 1890.2(10) | 19.1(3)        |
| C11  | 7336(4)    | 4768.1(12) | 1203.2(13) | 39.3(5)        |
| C12  | 7066(4)    | 4247.6(14) | 451.8(15)  | 47.3(6)        |

|     |         |            |            |         |
|-----|---------|------------|------------|---------|
| C13 | 5107(3) | 3710.6(10) | 386.2(12)  | 30.6(4) |
| C14 | 3397(4) | 3683.6(9)  | 1079.1(12) | 31.5(4) |
| C15 | 3634(3) | 4196.4(8)  | 1838.5(12) | 28.3(3) |

**Table 3.** Anisotropic Displacement Parameters ( $\text{\AA}^2 \times 10^3$ ) for r20210507a. The

Anisotropic displacement factor exponent takes the form: -

$$2\pi^2[h^2a^{*2}U_{11}+2hka^*b^*U_{12}+\dots].$$

| Atom | $U_{11}$ | $U_{22}$ | $U_{33}$ | $U_{23}$  | $U_{13}$ | $U_{12}$ |
|------|----------|----------|----------|-----------|----------|----------|
| F1   | 13.5(4)  | 31.0(4)  | 22.0(4)  | -5.0(3)   | 4.2(3)   | -3.4(3)  |
| F2   | 32.5(5)  | 15.4(4)  | 20.7(4)  | 1.9(3)    | 6.2(3)   | 0.3(3)   |
| O1   | 26.1(6)  | 23.2(5)  | 23.6(5)  | -3.3(4)   | 11.5(4)  | -7.2(4)  |
| O2   | 22.6(5)  | 17.5(4)  | 22.6(5)  | -1.4(3)   | 7.1(4)   | -4.1(4)  |
| O3   | 15.8(5)  | 24.9(5)  | 22.7(5)  | -4.4(4)   | 1.3(4)   | 1.4(4)   |
| N1   | 14.7(5)  | 21.9(5)  | 19.1(5)  | -3.9(4)   | 3.5(4)   | 1.8(4)   |
| C1   | 17.9(6)  | 18.2(5)  | 18.9(6)  | 0.0(4)    | 4.6(5)   | -0.6(4)  |
| C2   | 28.3(8)  | 25.7(6)  | 20.4(7)  | -5.0(5)   | 10.4(6)  | -1.9(5)  |
| C3   | 27.9(8)  | 23.1(6)  | 21.4(7)  | -6.5(5)   | 4.3(6)   | -0.8(5)  |
| C4   | 22.8(7)  | 20.8(6)  | 23.8(7)  | -4.8(5)   | 2.9(5)   | -3.7(5)  |
| C5   | 20.1(7)  | 20.6(6)  | 20.3(6)  | -1.4(5)   | 4.8(5)   | -2.8(5)  |
| C6   | 16.2(6)  | 15.8(5)  | 16.5(6)  | -0.7(4)   | 3.7(5)   | -0.4(4)  |
| C7   | 14.2(6)  | 16.0(5)  | 16.6(6)  | -0.7(4)   | 3.0(4)   | 1.2(4)   |
| C8   | 15.8(6)  | 15.7(5)  | 17.0(6)  | 0.0(4)    | 4.1(4)   | -0.2(4)  |
| C9   | 16.5(6)  | 16.6(5)  | 15.0(6)  | 0.6(4)    | 3.7(4)   | -0.1(4)  |
| C10  | 17.7(6)  | 21.9(6)  | 17.8(6)  | -3.4(4)   | 2.0(5)   | 3.4(5)   |
| C11  | 26.4(9)  | 60.5(11) | 32.7(9)  | -23.3(8)  | 12.2(7)  | -16.3(8) |
| C12  | 32.0(10) | 75.0(14) | 37.8(10) | -32.1(10) | 18.4(8)  | -15.0(9) |
| C13  | 27.7(8)  | 36.7(8)  | 27.2(8)  | -15.7(6)  | 1.2(6)   | 5.0(6)   |
| C14  | 39.9(10) | 22.0(6)  | 33.6(8)  | -7.9(6)   | 8.7(7)   | -6.0(6)  |
| C15  | 36.3(9)  | 22.4(6)  | 28.6(8)  | -5.3(5)   | 14.5(6)  | -6.1(6)  |

**Table 4.** Bond Lengths for r20210507a.

| Atom | Atom | Length/ $\text{\AA}$ |
|------|------|----------------------|
| 1    | C8   | 1.3660(15)           |
| F2   | C8   | 1.3666(14)           |
| O1   | C1   | 1.3494(16)           |
| O2   | C7   | 1.2251(15)           |
| O3   | C9   | 1.2234(17)           |
| N1   | C9   | 1.3406(16)           |

|     |     |            |
|-----|-----|------------|
| N1  | C10 | 1.4357(17) |
| C1  | C2  | 1.3990(18) |
| C1  | C6  | 1.4128(18) |
| C2  | C3  | 1.379(2)   |
| C3  | C4  | 1.394(2)   |
| C4  | C5  | 1.3811(19) |
| C5  | C6  | 1.4160(18) |
| C6  | C7  | 1.4637(17) |
| C7  | C8  | 1.5488(18) |
| C8  | C9  | 1.5429(18) |
| C10 | C11 | 1.384(2)   |
| C10 | C15 | 1.382(2)   |
| C11 | C12 | 1.394(2)   |
| C12 | C13 | 1.375(3)   |
| C13 | C14 | 1.381(2)   |
| C14 | C15 | 1.393(2)   |

**Table 5.** Bond Angles for r20210507a.

| Atom | Atom | Atom | Angle/°    |
|------|------|------|------------|
| C9   | N1   | C10  | 123.60(12) |
| O1   | C1   | C2   | 116.65(12) |
| O1   | C1   | C6   | 123.61(12) |
| C2   | C1   | C6   | 119.73(12) |
| C3   | C2   | C1   | 120.28(13) |
| C2   | C3   | C4   | 120.96(13) |
| C5   | C4   | C3   | 119.50(13) |
| C4   | C5   | C6   | 120.93(13) |
| C1   | C6   | C5   | 118.56(12) |
| C1   | C6   | C7   | 119.04(11) |
| C5   | C6   | C7   | 122.38(12) |
| O2   | C7   | C6   | 123.86(12) |
| O2   | C7   | C8   | 116.77(11) |
| C6   | C7   | C8   | 119.37(11) |
| F1   | C8   | F2   | 106.52(10) |
| F1   | C8   | C7   | 109.09(10) |
| F1   | C8   | C9   | 111.74(10) |
| F2   | C8   | C7   | 109.47(10) |
| F2   | C8   | C9   | 106.66(10) |
| C9   | C8   | C7   | 113.11(10) |
| O3   | C9   | N1   | 127.31(12) |
| O3   | C9   | C8   | 117.64(11) |
| N1   | C9   | C8   | 114.99(11) |

|     |     |     |            |
|-----|-----|-----|------------|
| C11 | C10 | N1  | 118.29(13) |
| C15 | C10 | N1  | 120.91(13) |
| C15 | C10 | C11 | 120.76(13) |
| C10 | C11 | C12 | 118.99(16) |
| C13 | C12 | C11 | 120.94(16) |
| C12 | C13 | C14 | 119.45(14) |
| C13 | C14 | C15 | 120.64(15) |
| C10 | C15 | C14 | 119.22(14) |

**Table 6.** Torsion Angles for r20210507a.

| A  | B   | C   | D   | Angle/°     |
|----|-----|-----|-----|-------------|
| F1 | C8  | C9  | O3  | -175.97(11) |
| F1 | C8  | C9  | N1  | 1.33(15)    |
| F2 | C8  | C9  | O3  | -59.94(15)  |
| F2 | C8  | C9  | N1  | 117.35(12)  |
| O1 | C1  | C2  | C3  | 179.17(14)  |
| O1 | C1  | C6  | C5  | -179.63(13) |
| O1 | C1  | C6  | C7  | -1.3(2)     |
| O2 | C7  | C8  | F1  | -110.94(13) |
| O2 | C7  | C8  | F2  | 132.87(12)  |
| O2 | C7  | C8  | C9  | 14.08(17)   |
| N1 | C10 | C11 | C12 | 178.44(18)  |
| N1 | C10 | C15 | C14 | -178.58(14) |
| C1 | C2  | C3  | C4  | 0.8(2)      |
| C1 | C6  | C7  | O2  | -12.7(2)    |
| C1 | C6  | C7  | C8  | 166.39(12)  |
| C2 | C1  | C6  | C5  | 1.2(2)      |
| C2 | C1  | C6  | C7  | 179.53(13)  |
| C2 | C3  | C4  | C5  | 0.4(2)      |
| C3 | C4  | C5  | C6  | -0.8(2)     |
| C4 | C5  | C6  | C1  | 0.0(2)      |
| C4 | C5  | C6  | C7  | -178.30(13) |
| C5 | C6  | C7  | O2  | 165.62(13)  |
| C5 | C6  | C7  | C8  | -15.33(19)  |
| C6 | C1  | C2  | C3  | -1.6(2)     |
| C6 | C7  | C8  | F1  | 69.95(14)   |
| C6 | C7  | C8  | F2  | -46.25(16)  |
| C6 | C7  | C8  | C9  | -165.03(11) |
| C7 | C8  | C9  | O3  | 60.45(15)   |
| C7 | C8  | C9  | N1  | -122.25(12) |
| C9 | N1  | C10 | C11 | 136.12(16)  |
| C9 | N1  | C10 | C15 | -45.8(2)    |



|     |     |     |     |             |
|-----|-----|-----|-----|-------------|
| C10 | N1  | C9  | O3  | -1.4(2)     |
| C10 | N1  | C9  | C8  | -178.41(11) |
| C10 | C11 | C12 | C13 | 0.2(3)      |
| C11 | C10 | C15 | C14 | -0.6(3)     |
| C11 | C12 | C13 | C14 | -0.5(3)     |
| C12 | C13 | C14 | C15 | 0.3(3)      |
| C13 | C14 | C15 | C10 | 0.2(3)      |
| C15 | C10 | C11 | C12 | 0.4(3)      |

**Table 7.** Hydrogen Atom Coordinates ( $\text{\AA}\times 10^4$ ) and Isotropic Displacement

Parameters ( $\text{\AA}^2\times 10^3$ ) for r20210507a.

| Atom | x       | y       | z       | U(eq) |
|------|---------|---------|---------|-------|
| H1   | 273.39  | 5636.32 | 5802.22 | 36    |
| H1A  | 7529.94 | 5337.33 | 2945.39 | 22    |
| H2   | 725.12  | 7010.94 | 7437.65 | 29    |
| H3   | 3644.34 | 8025.77 | 7492.71 | 29    |
| H4   | 6501.08 | 8173.11 | 6315.48 | 27    |
| H5   | 6398.22 | 7299.31 | 5066.89 | 24    |
| H11  | 8691.49 | 5138.61 | 1243.32 | 47    |
| H12  | 8251.95 | 4264.12 | -21.77  | 57    |
| H13  | 4931.09 | 3361.02 | -131.58 | 37    |
| H14  | 2045.67 | 3311.72 | 1037.63 | 38    |
| H15  | 2457.3  | 4174.8  | 2315.09 | 34    |

## 6. NMR Spectra for Products

### 2,2-difluoro-3-(2-hydroxyphenyl)-3-oxo-*N*-phenylpropanamide (2a)

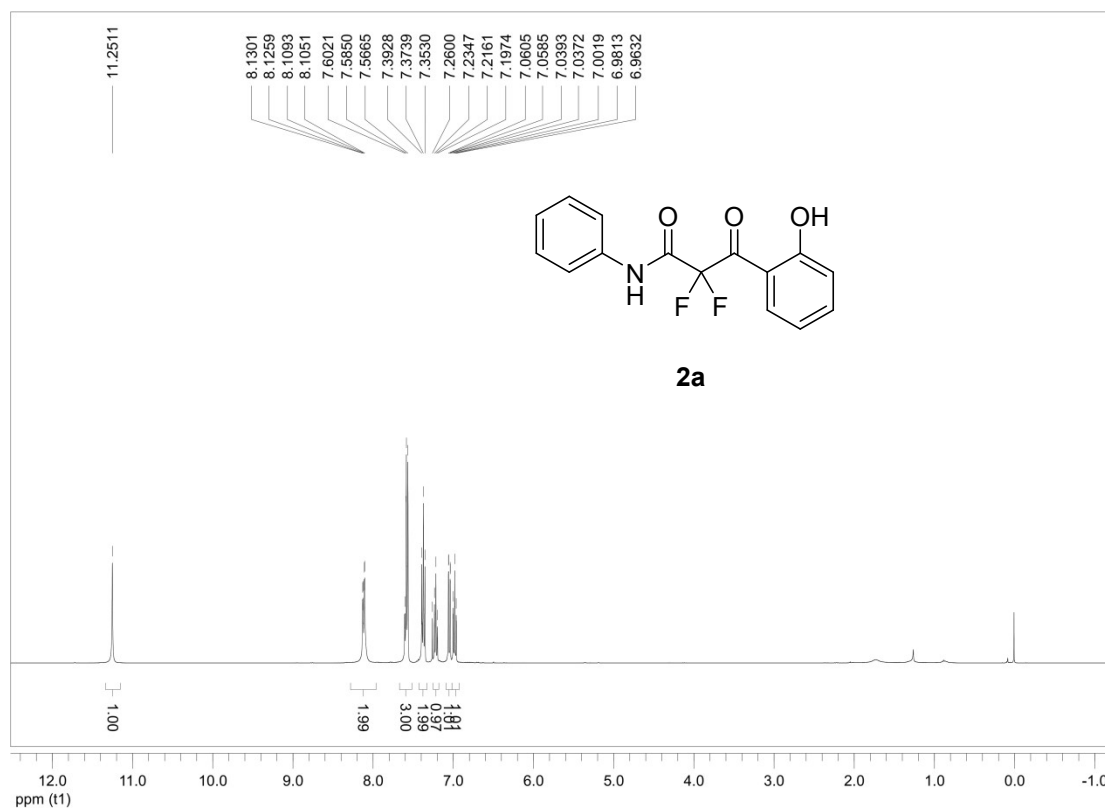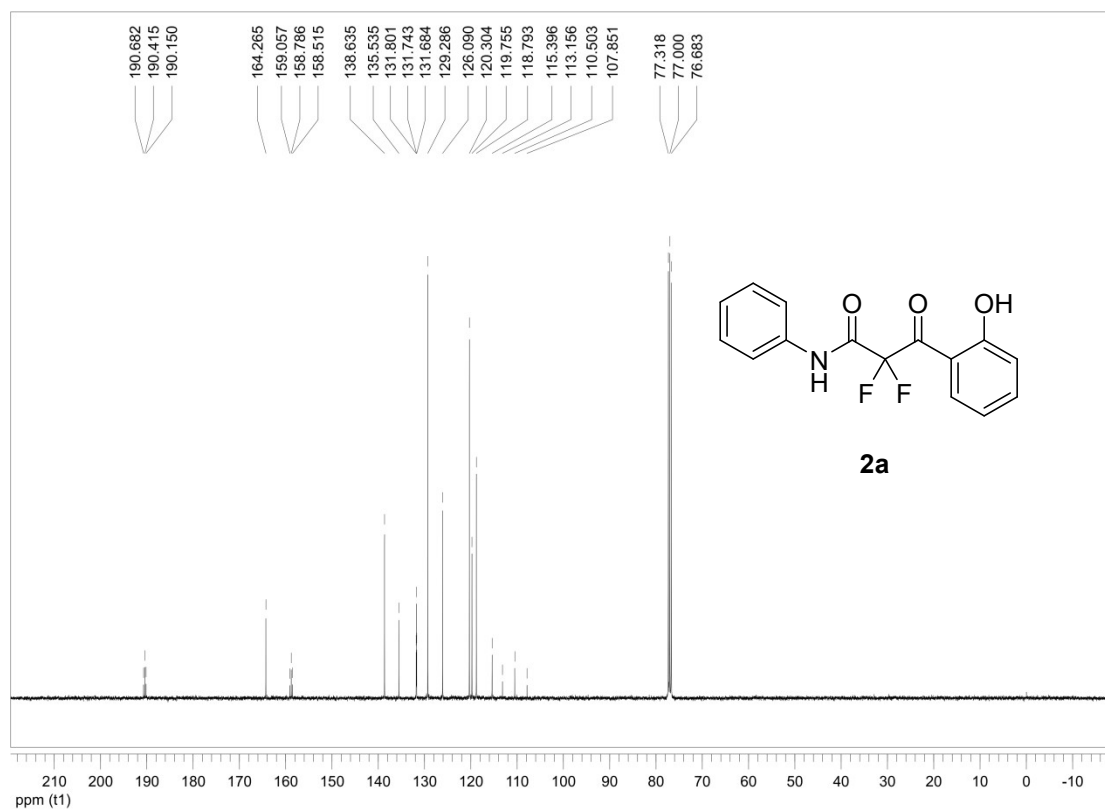

**2,2-difluoro-3-(2-hydroxyphenyl)-3-oxo-N-(*m*-tolyl)propanamide (2b)**

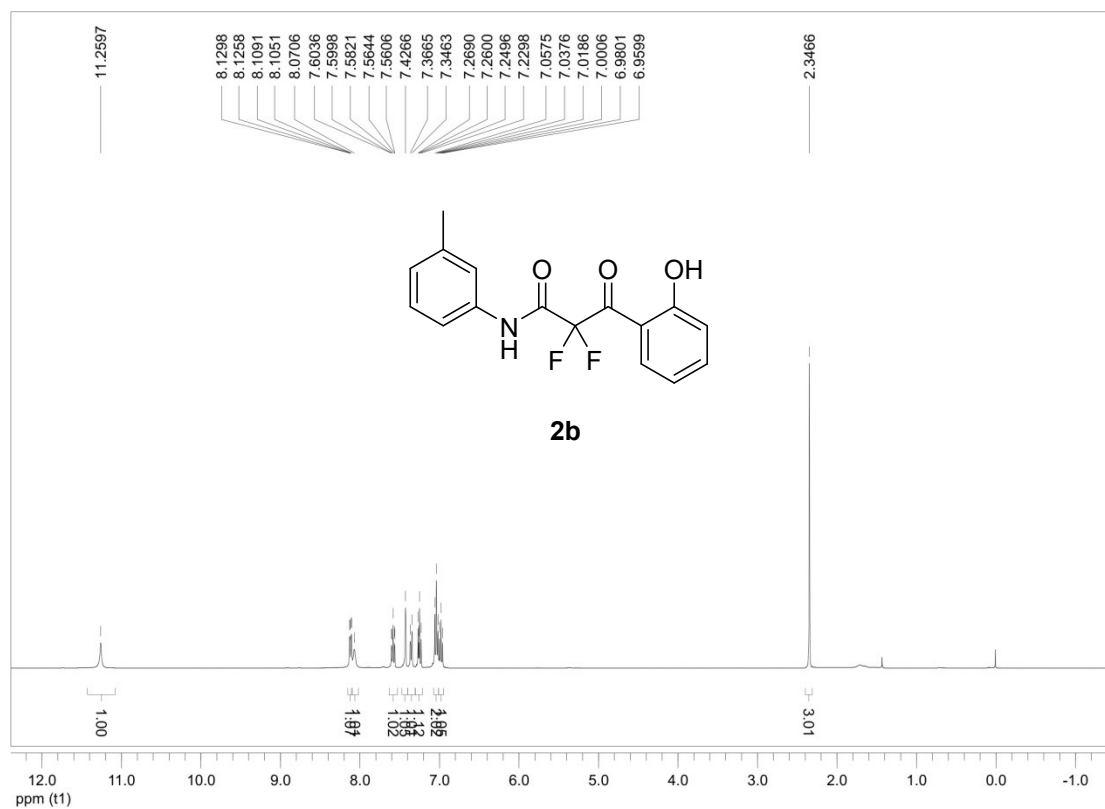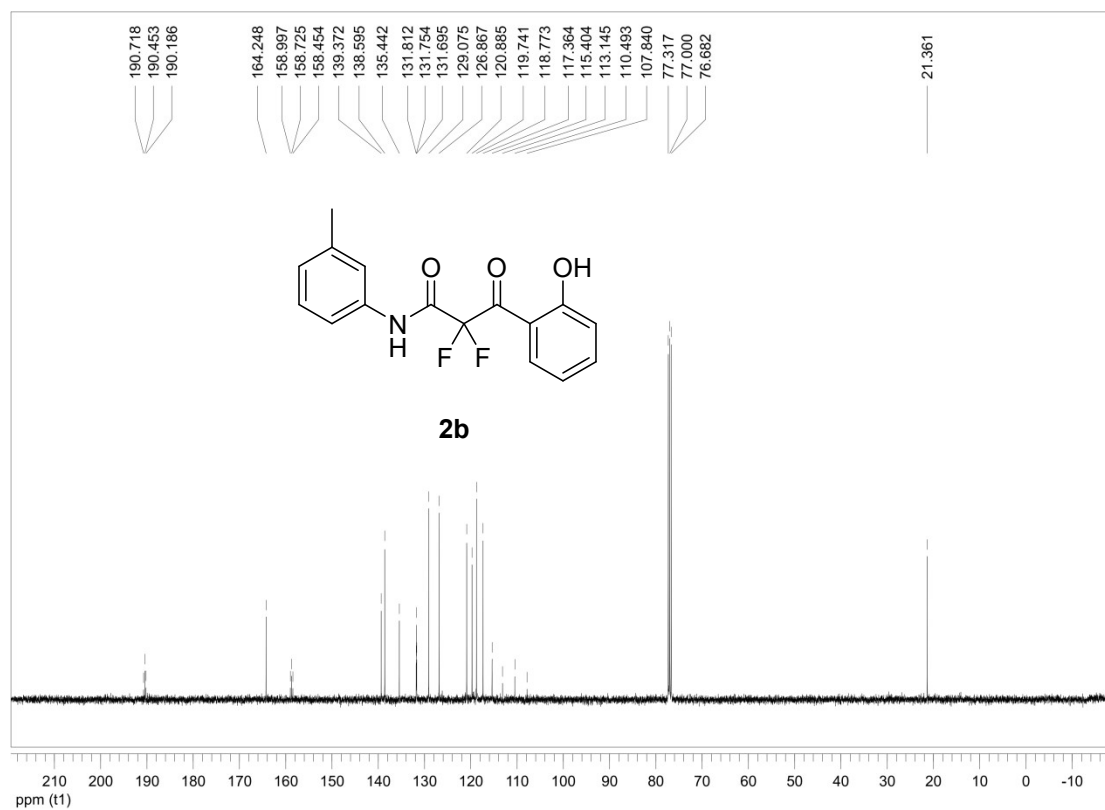

**2,2-difluoro-3-(2-hydroxyphenyl)-3-oxo-N-(*p*-tolyl)propanamide (2c)**

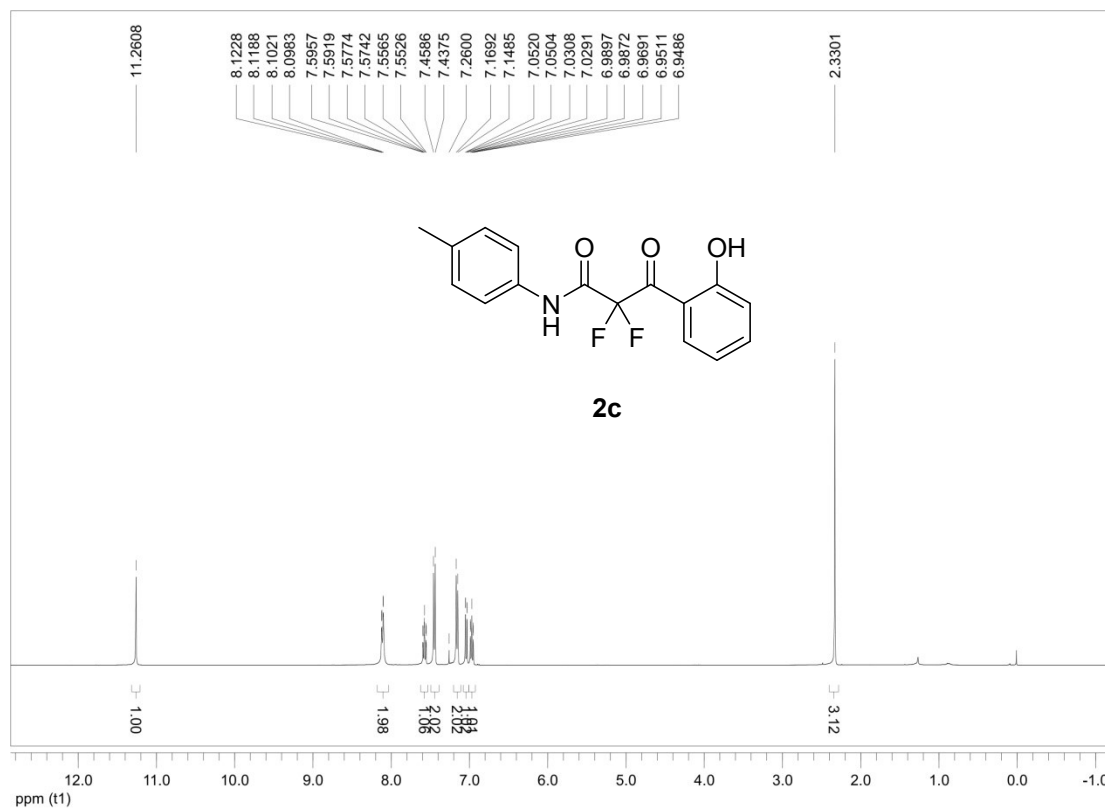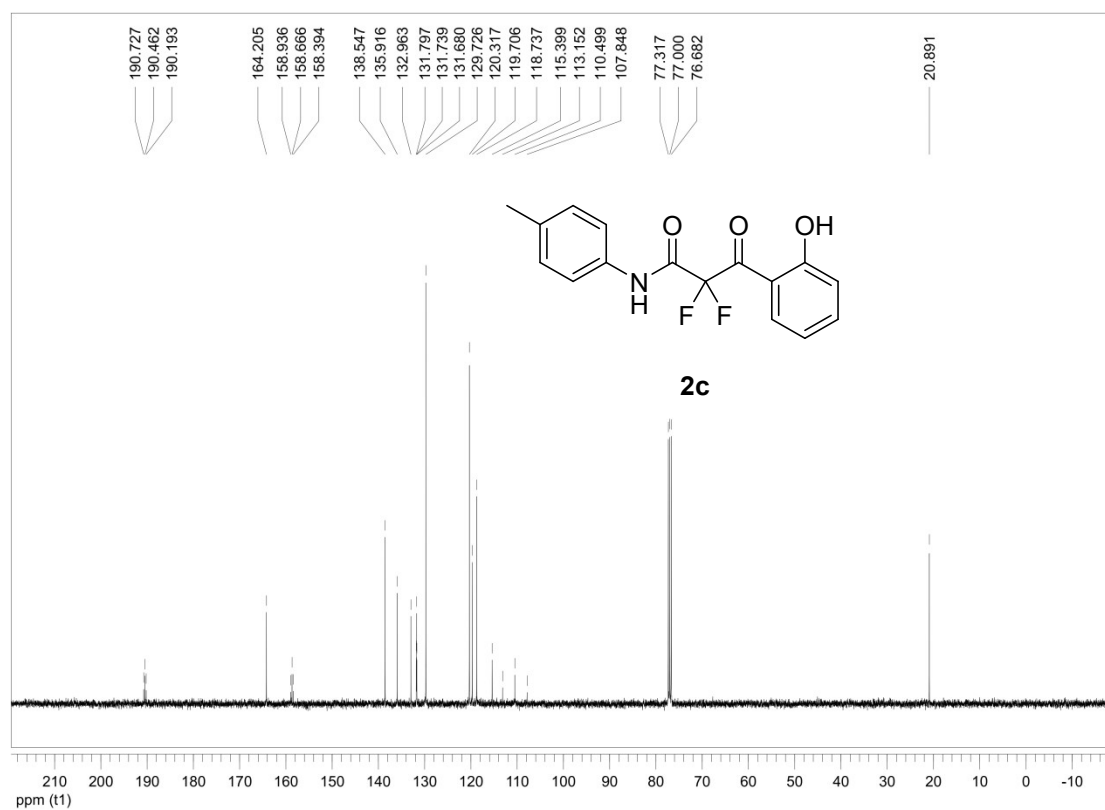

**2,2-difluoro-3-(2-hydroxyphenyl)-N-(2-methoxyphenyl)-3-oxopropanamide (2d)**

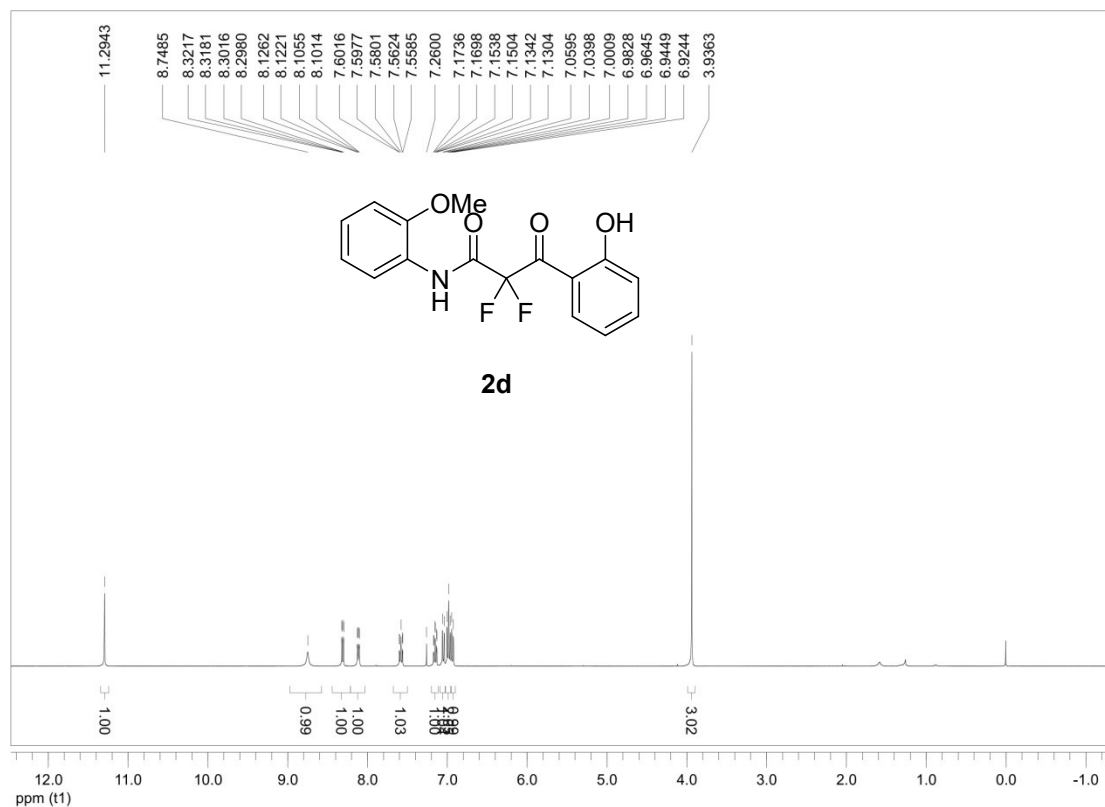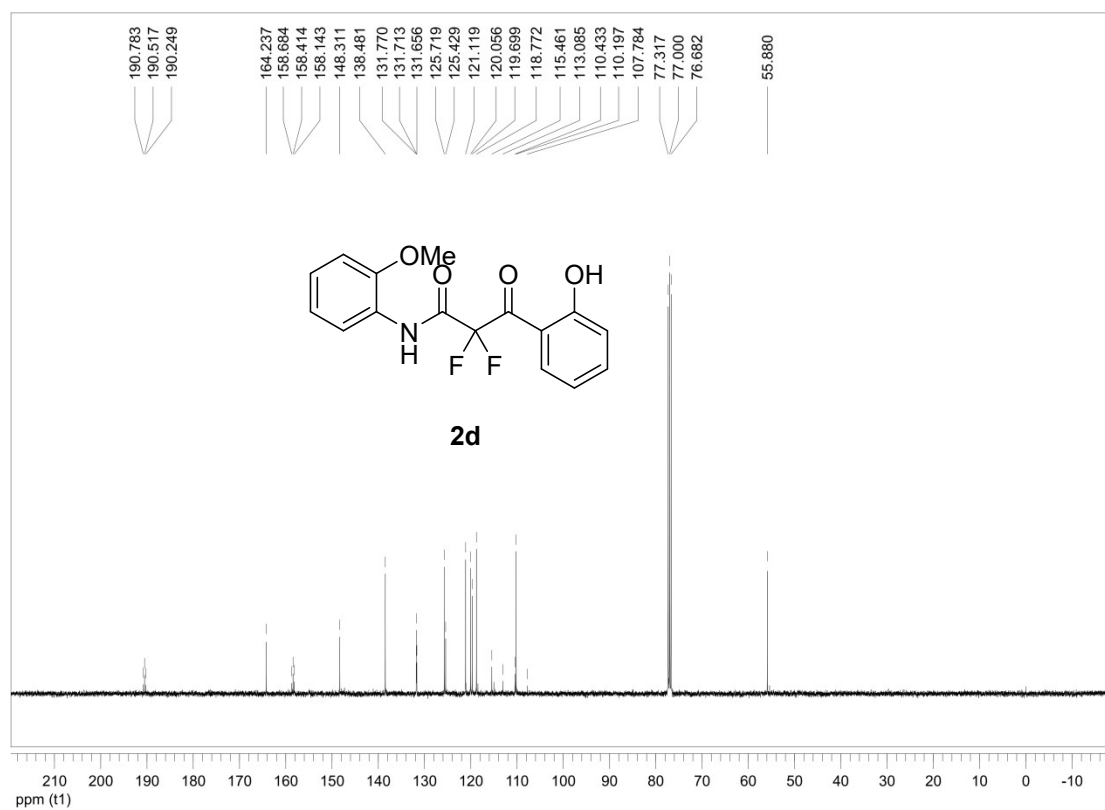

**2,2-difluoro-3-(2-hydroxyphenyl)-N-(4-methoxyphenyl)-3-oxopropanamide (2e)**

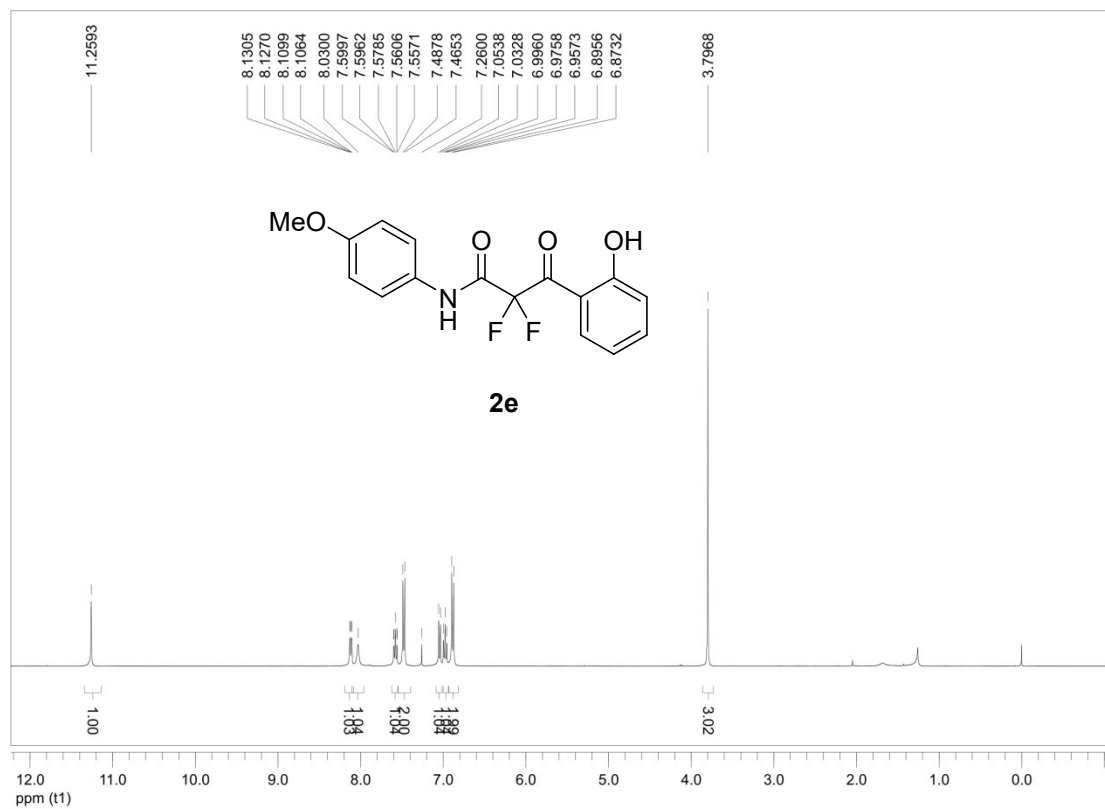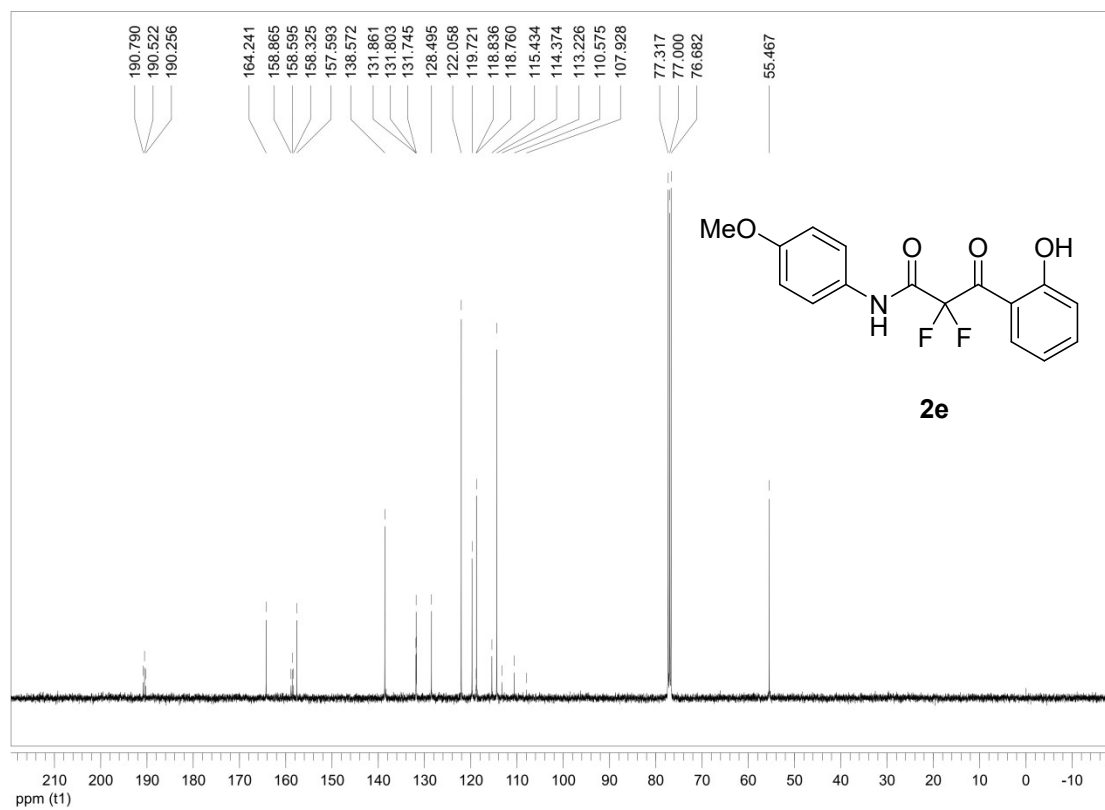

***N*-(4-(*tert*-butyl)phenyl)-2,2-difluoro-3-(2-hydroxyphenyl)-3-oxopropanamide (2f)**

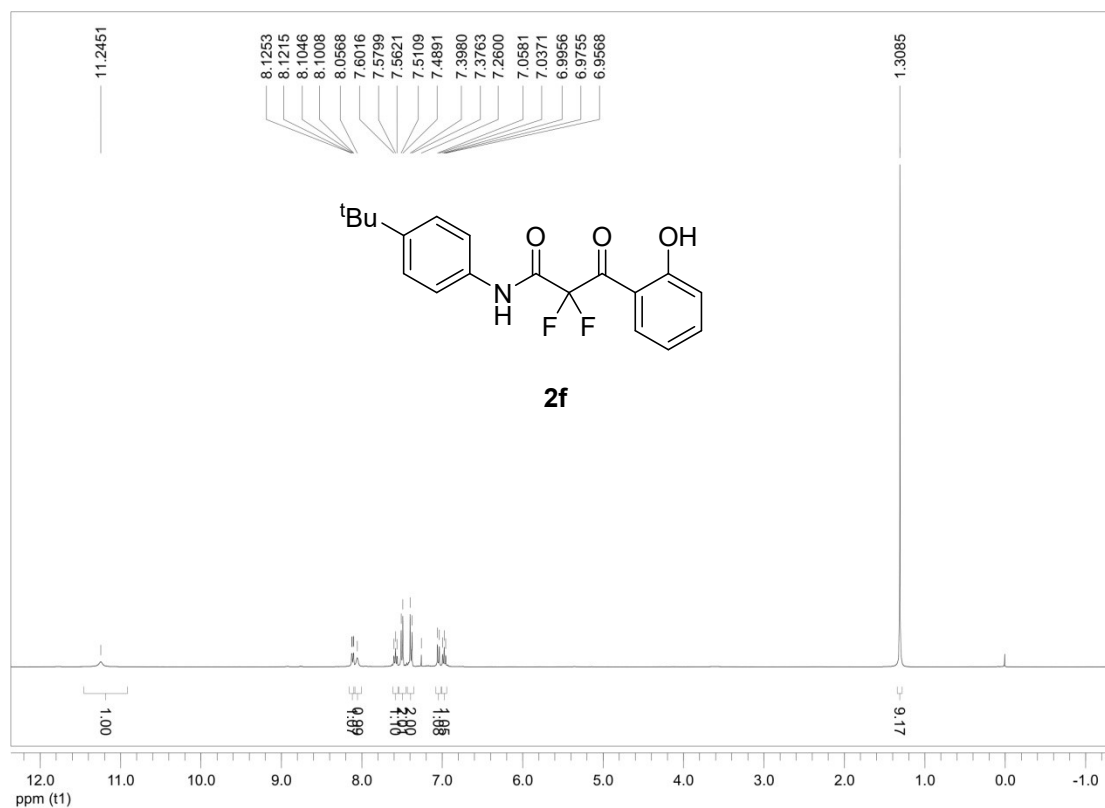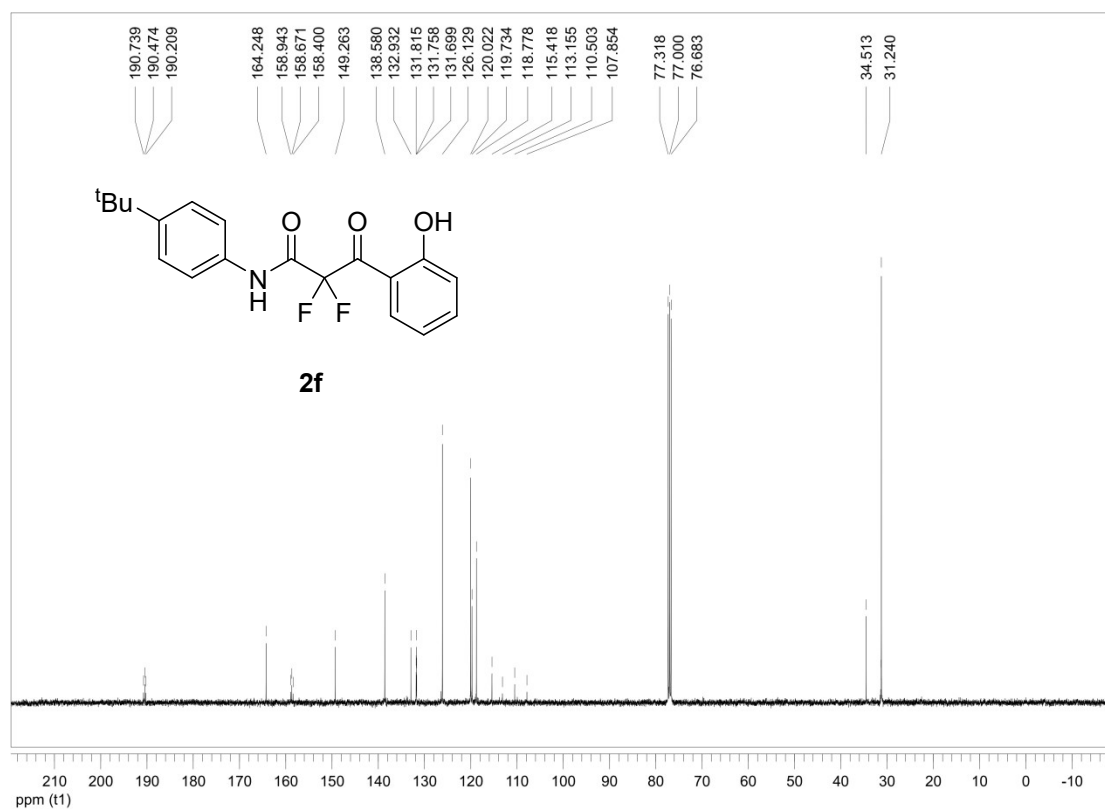

**2,2-difluoro-N-(4-fluorophenyl)-3-(2-hydroxyphenyl)-3-oxopropanamide (2g)**

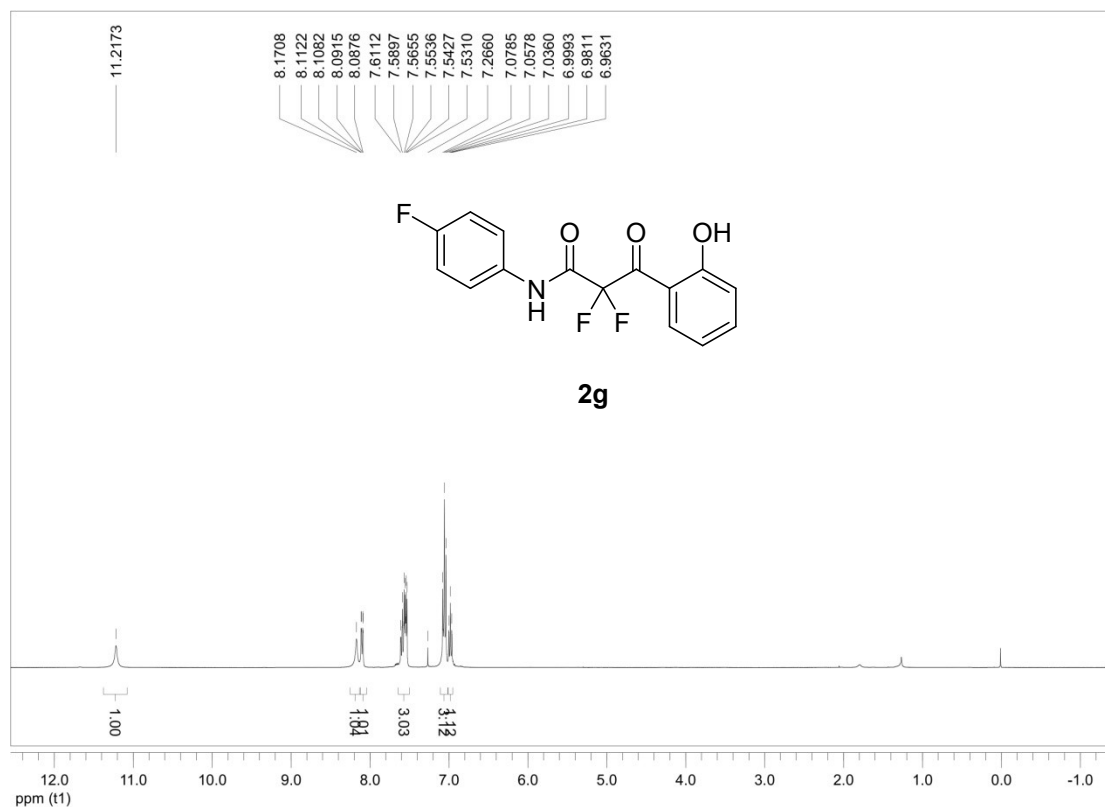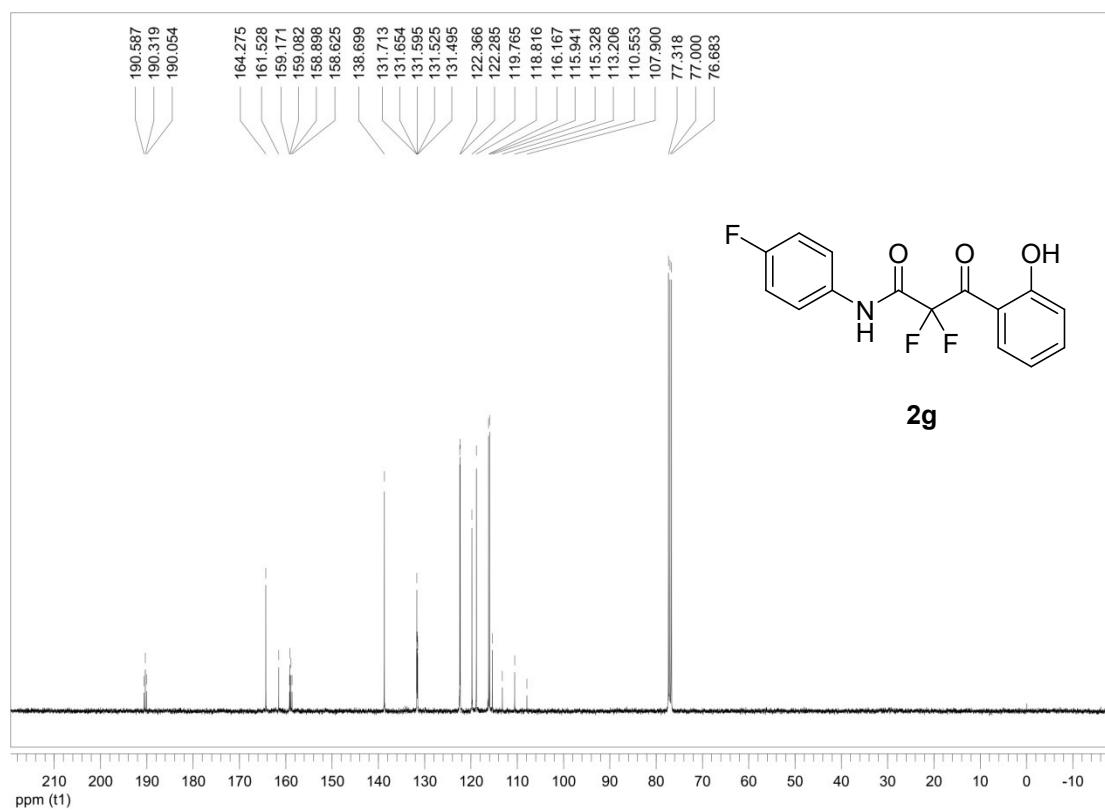



***N*-(4-chlorophenyl)-2,2-difluoro-3-(2-hydroxyphenyl)-3-oxopropanamide (2h)**

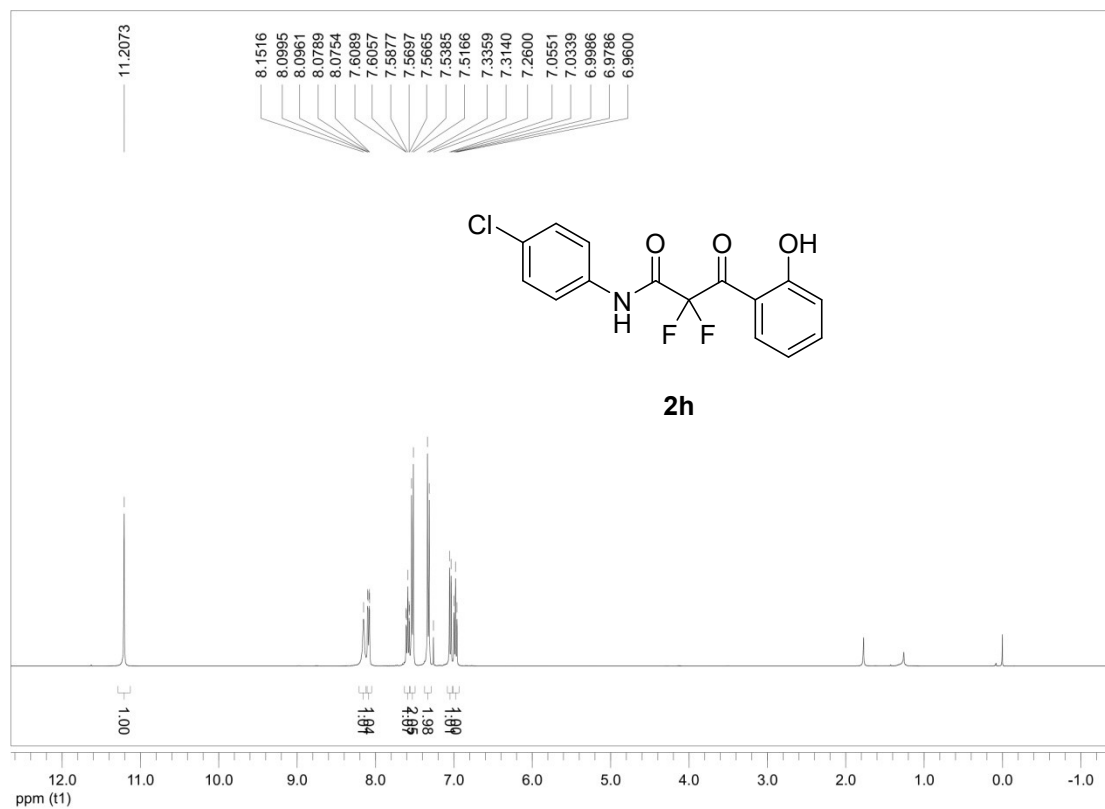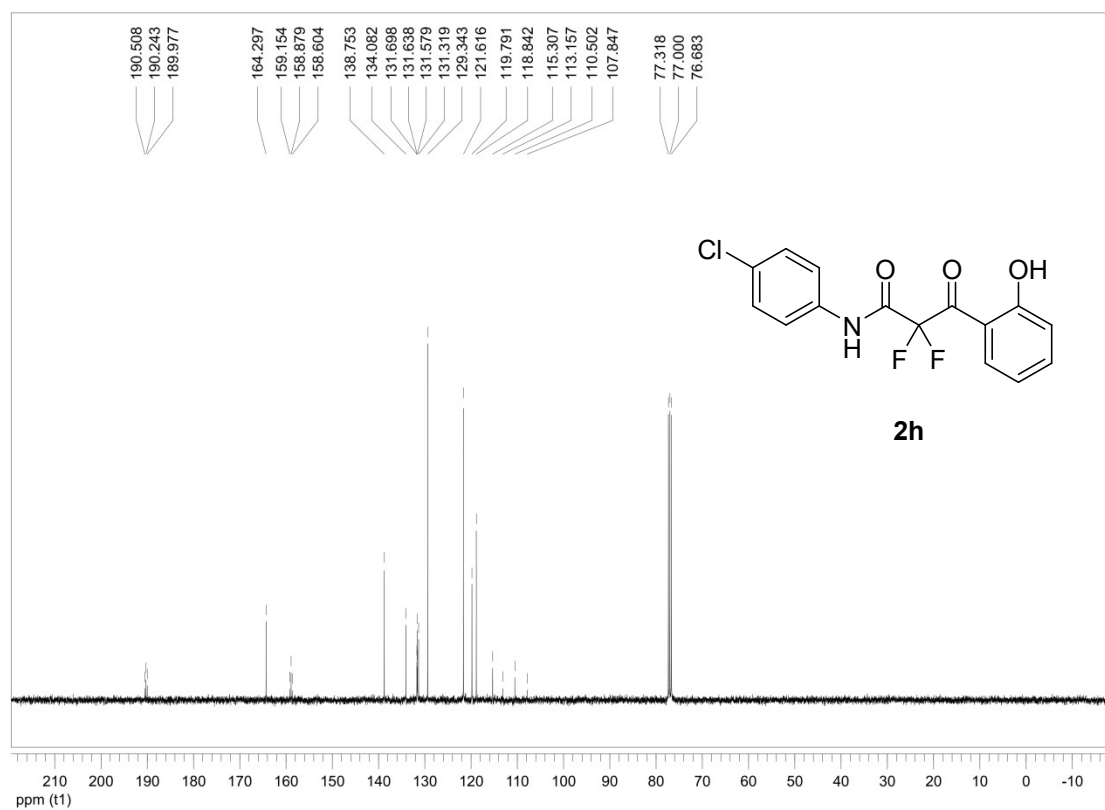

***N*-(3-chlorophenyl)-2,2-difluoro-3-(2-hydroxyphenyl)-3-oxopropanamide (2i)**

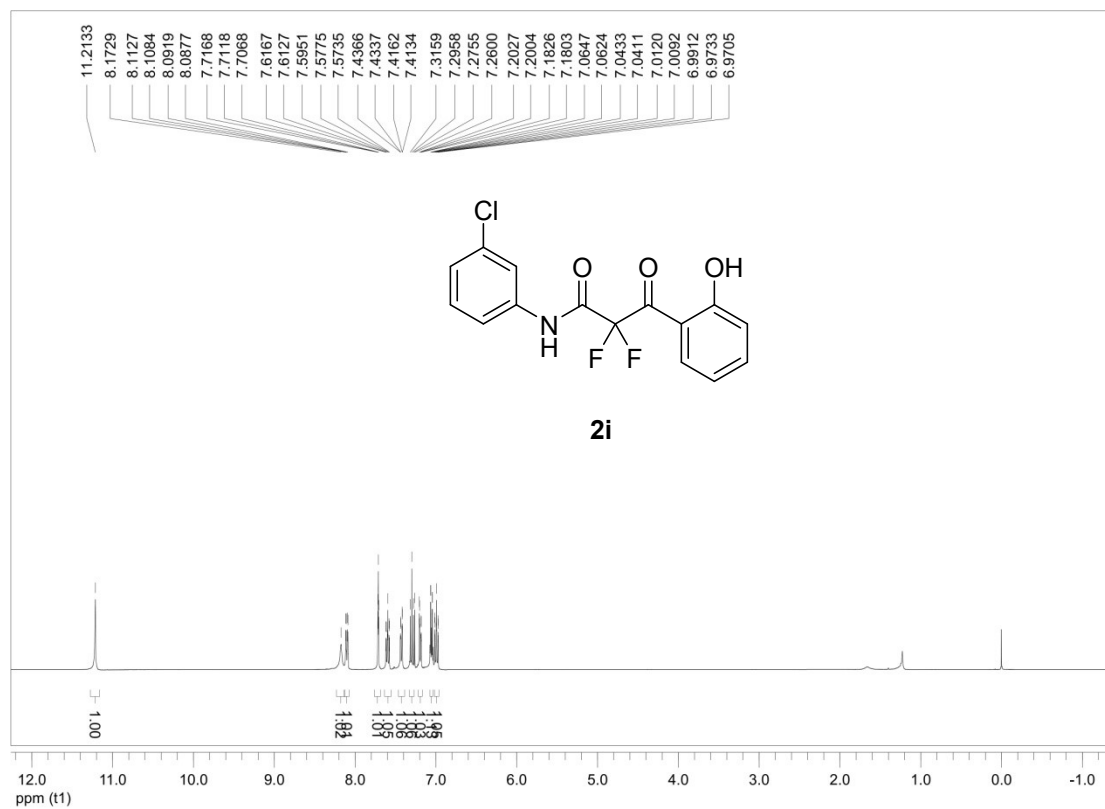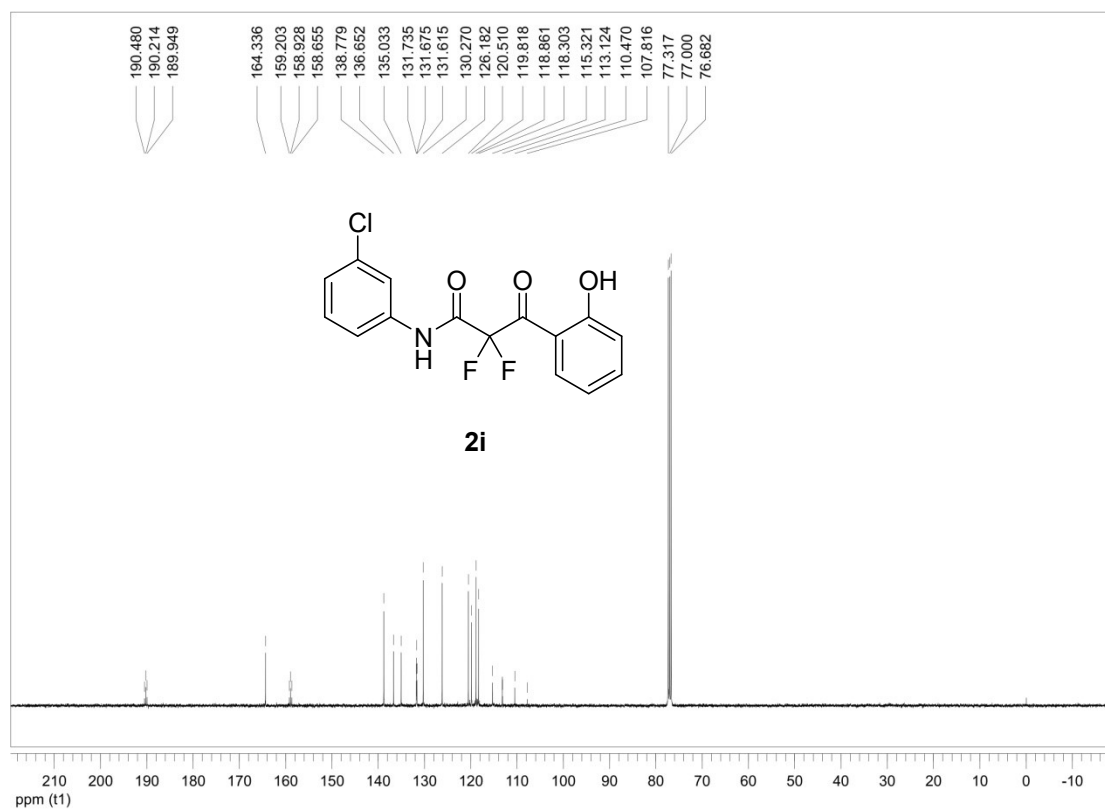

***N*-(4-bromophenyl)-2,2-difluoro-3-(2-hydroxyphenyl)-3-oxopropanamide (2j)**

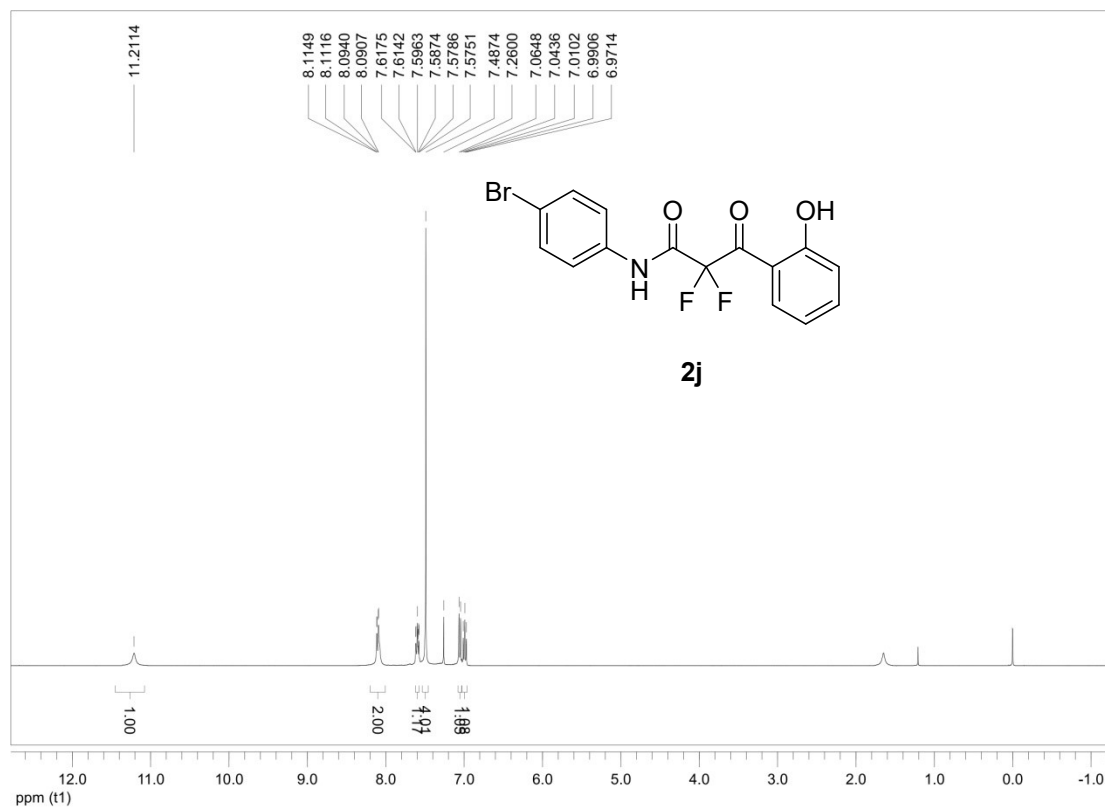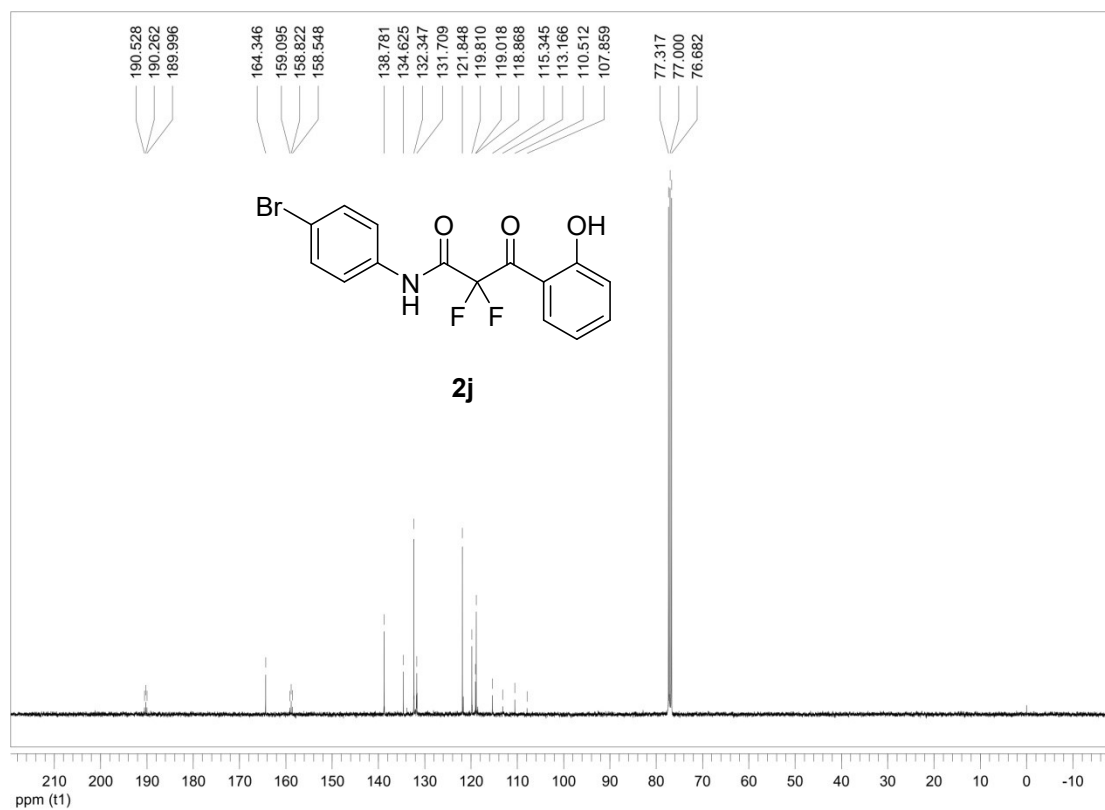

***N*-(3-bromophenyl)-2,2-difluoro-3-(2-hydroxyphenyl)-3-oxopropanamide (2k)**

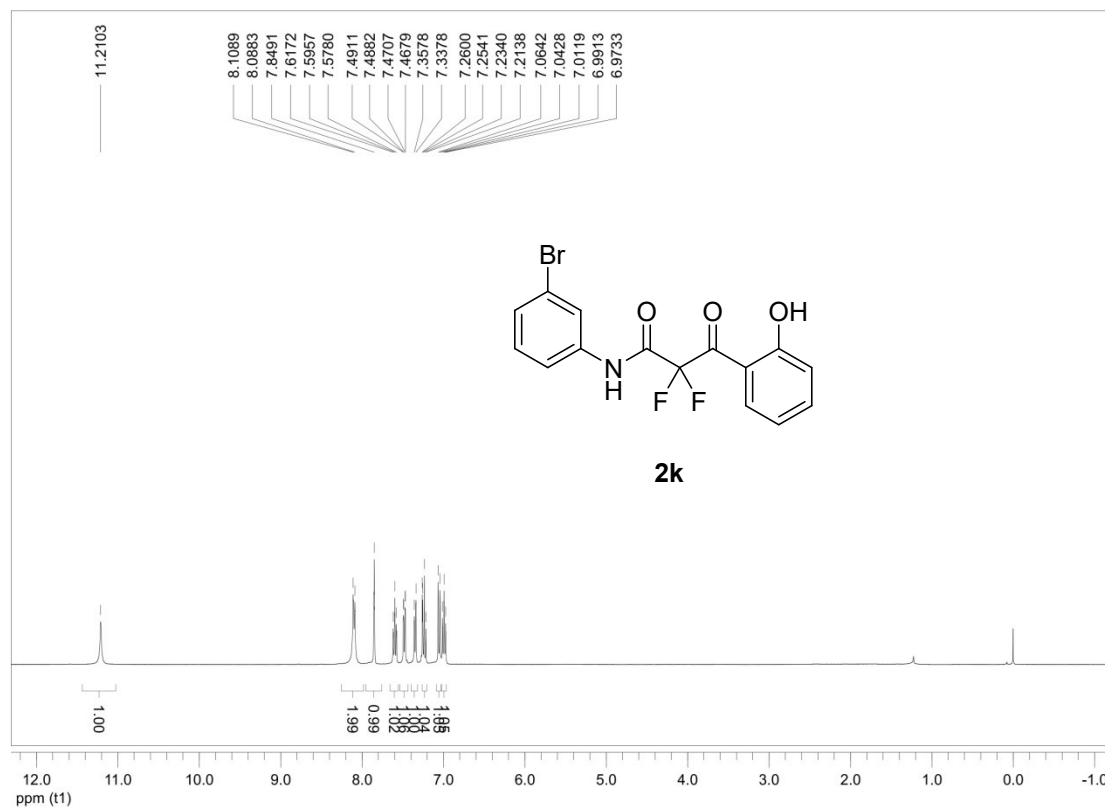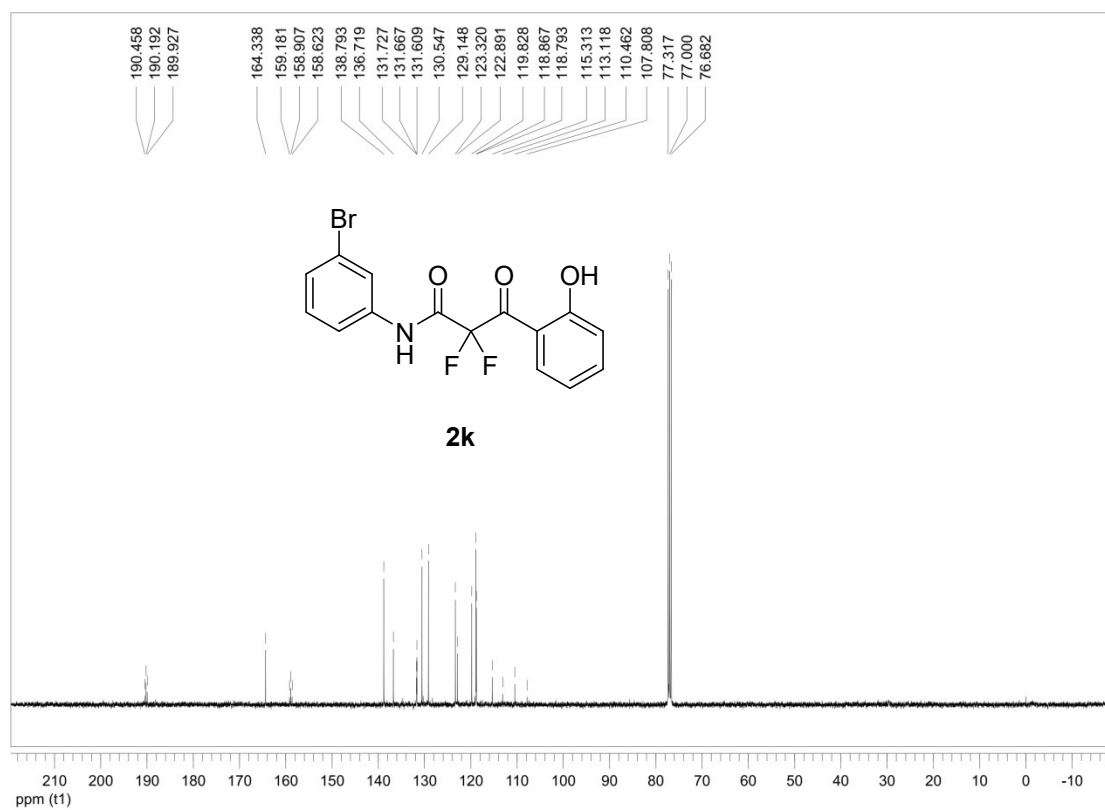

***N*-([1,1'-biphenyl]-4-yl)-2,2-difluoro-3-(2-hydroxyphenyl)-3-oxopropanamide (2I)**

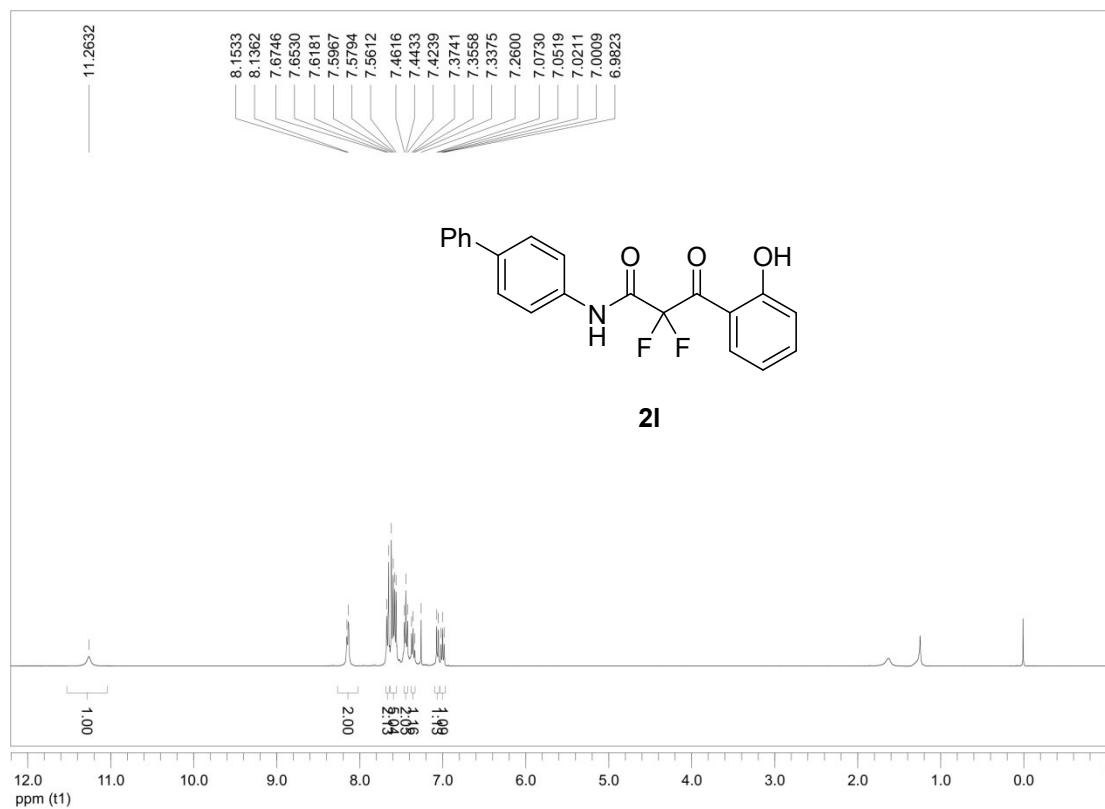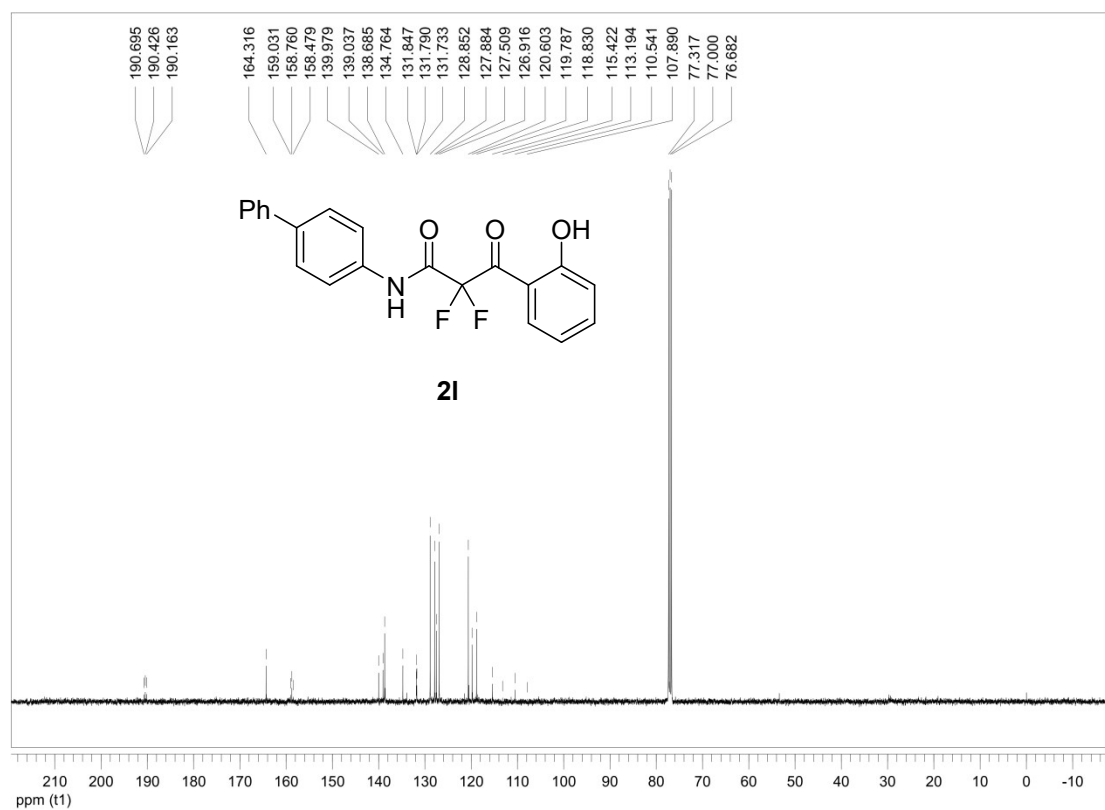

**2,2-difluoro-3-(2-hydroxy-4-methylphenyl)-3-oxo-N-phenylpropanamide (2m)**

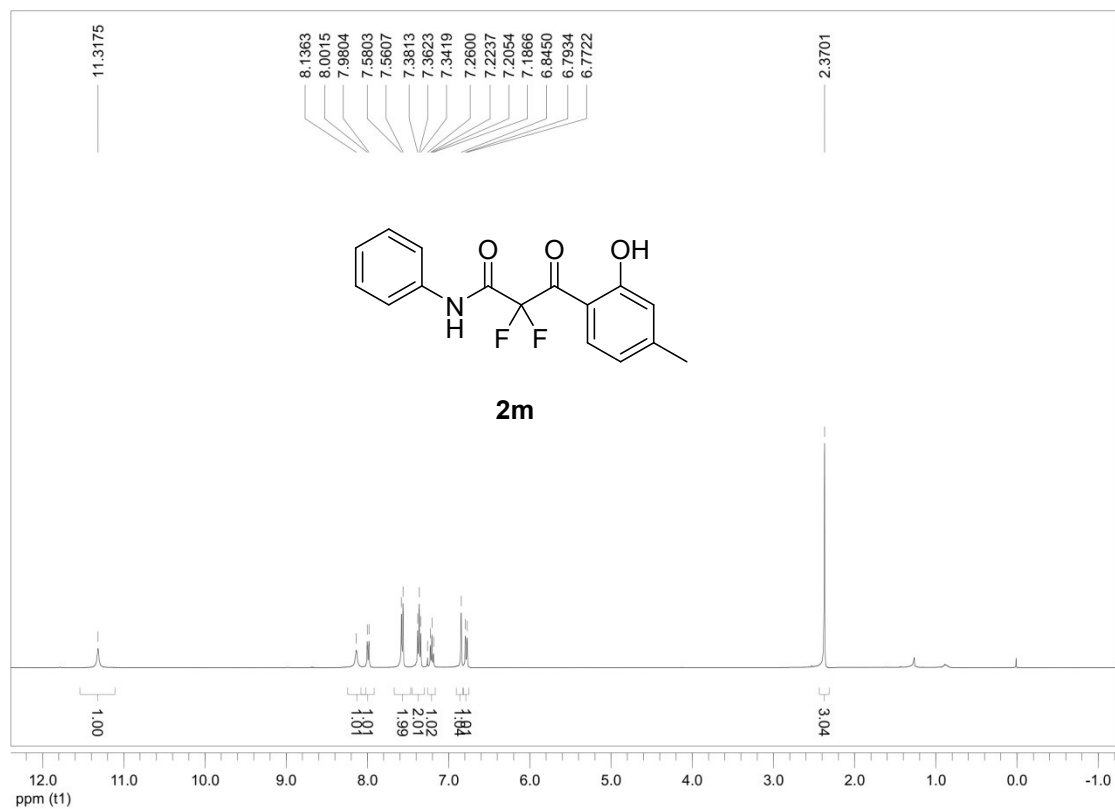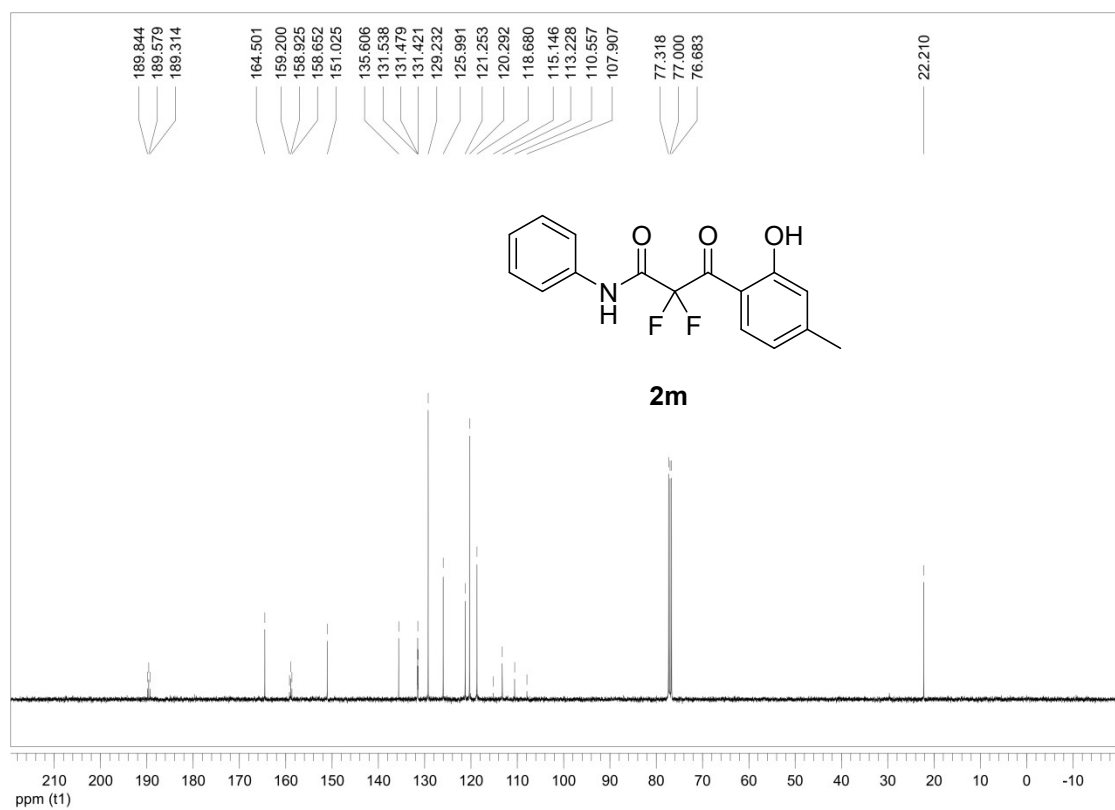

**2,2-difluoro-3-(2-hydroxy-4-methoxyphenyl)-3-oxo-*N*-phenylpropanamide (2n)**

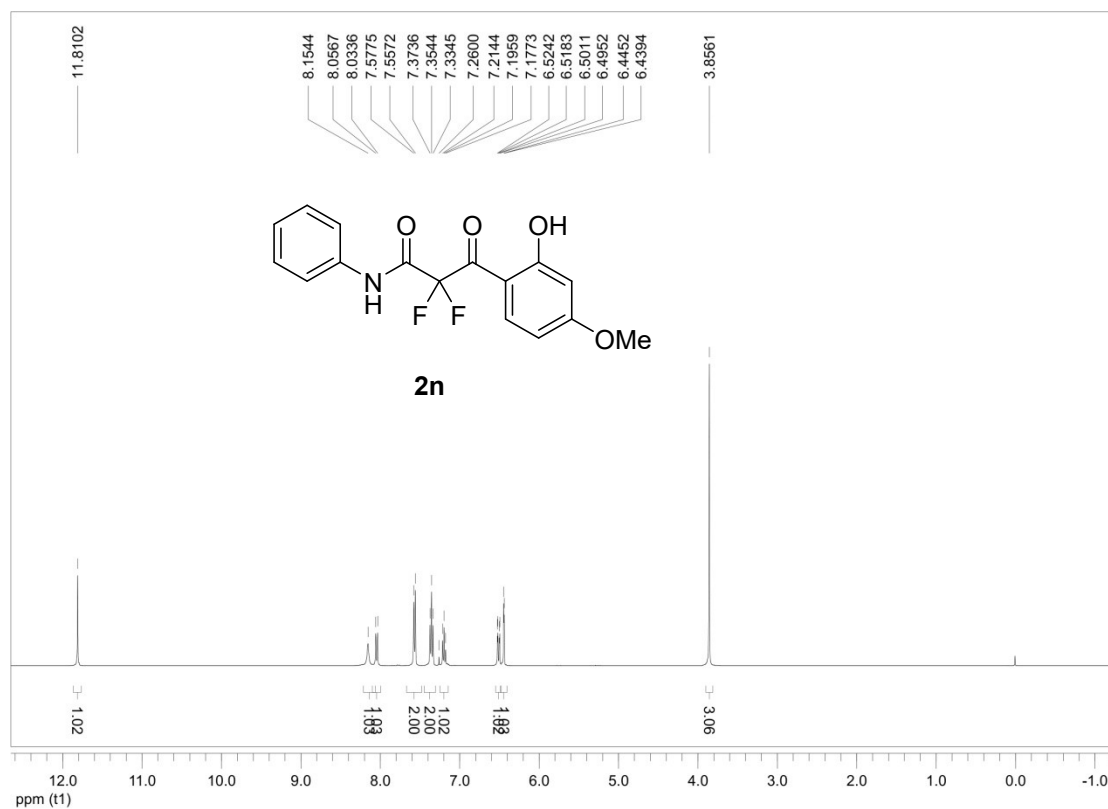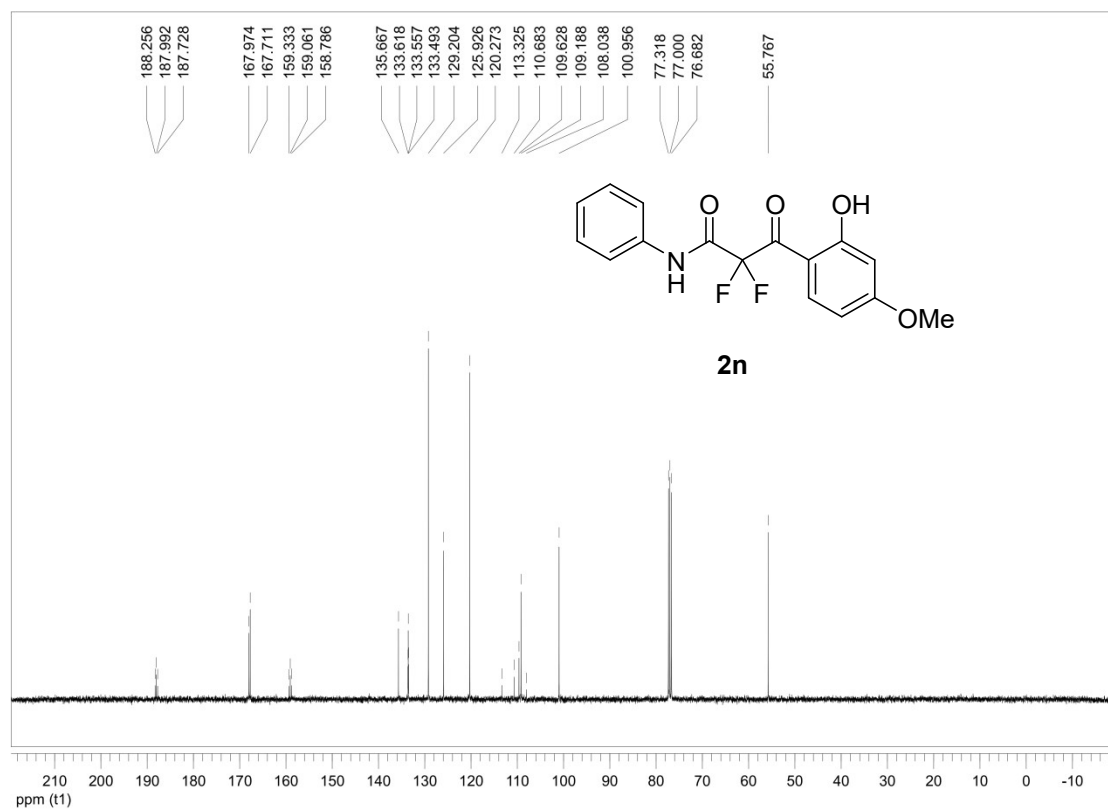

**3-(5-chloro-2-hydroxyphenyl)-2,2-difluoro-3-oxo-*N*-phenylpropanamide (2o)**

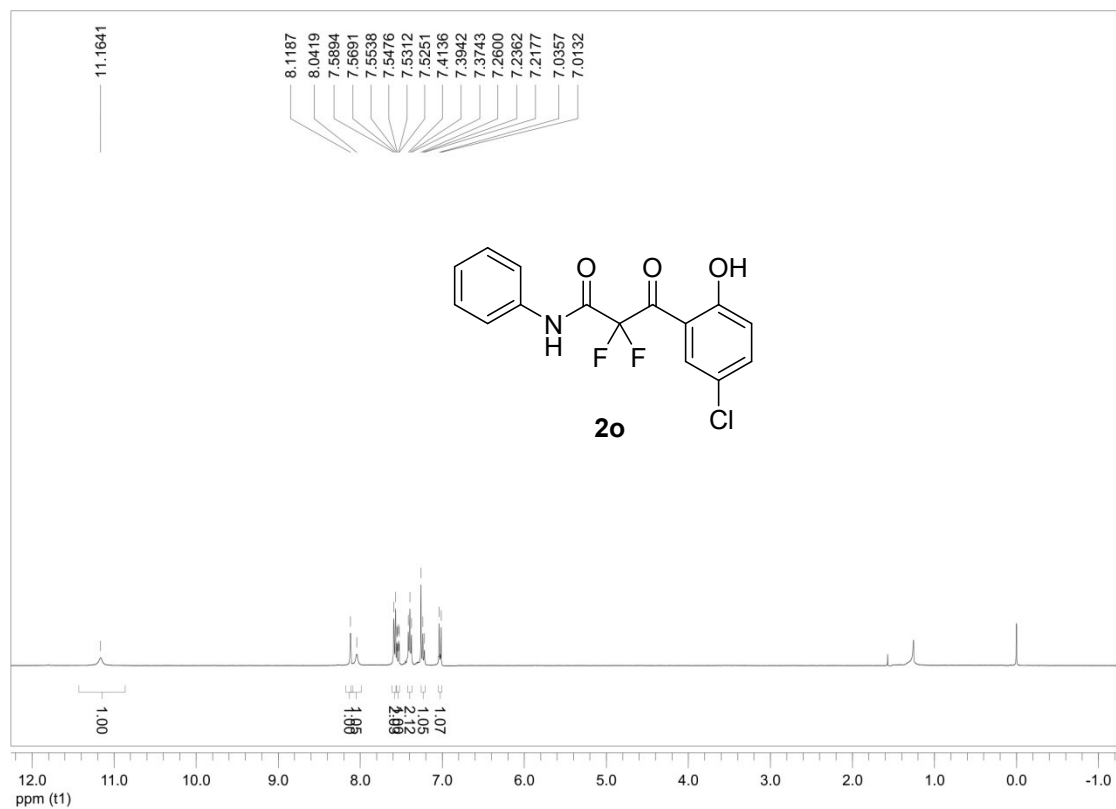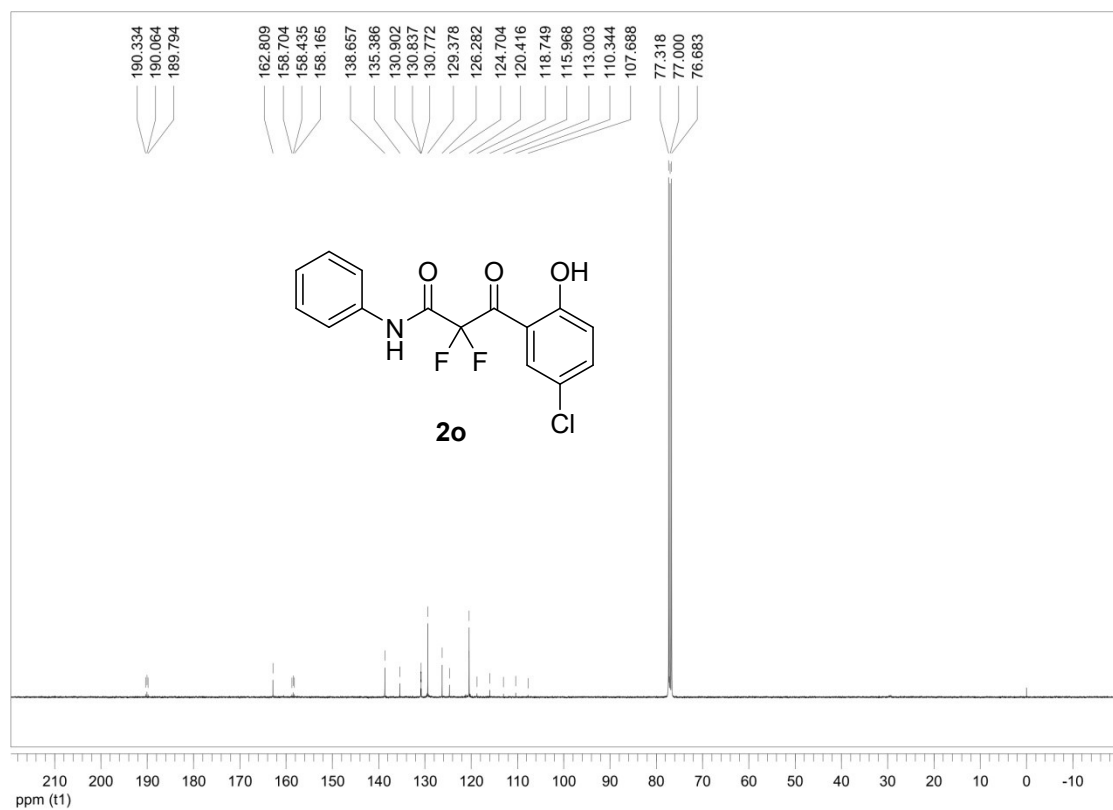



**3-(5-bromo-2-hydroxyphenyl)-2,2-difluoro-3-oxo-N-phenylpropanamide (2p)**

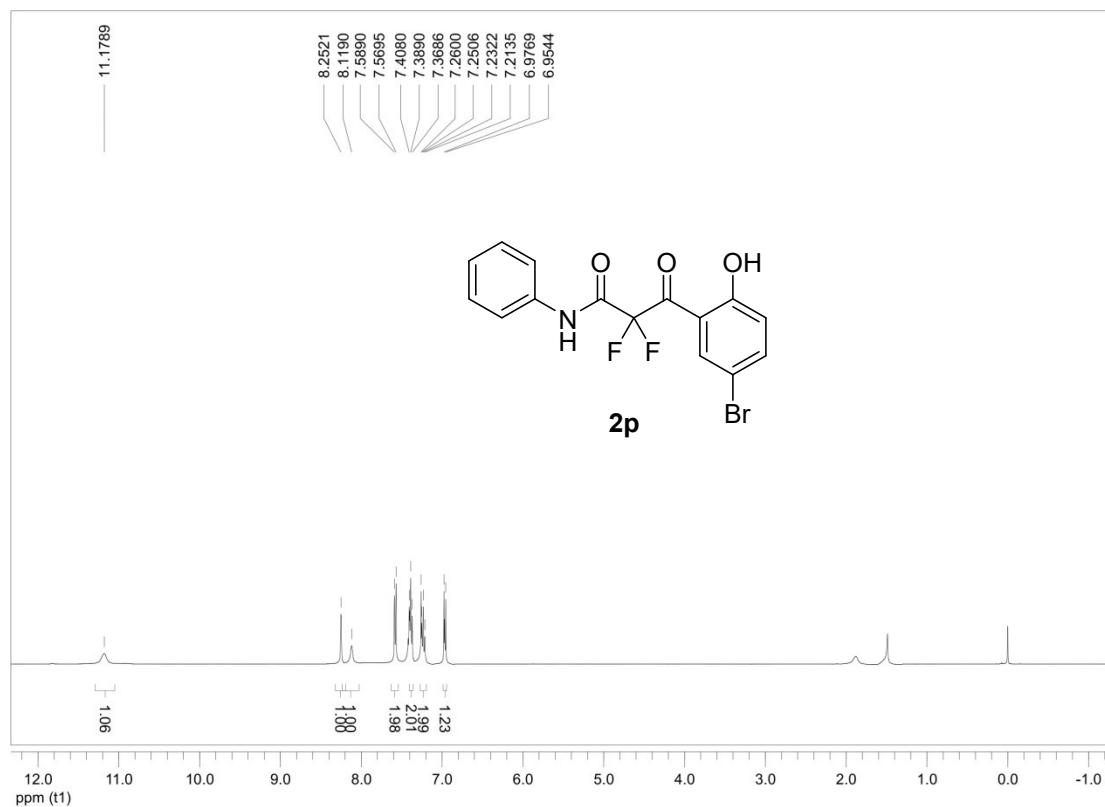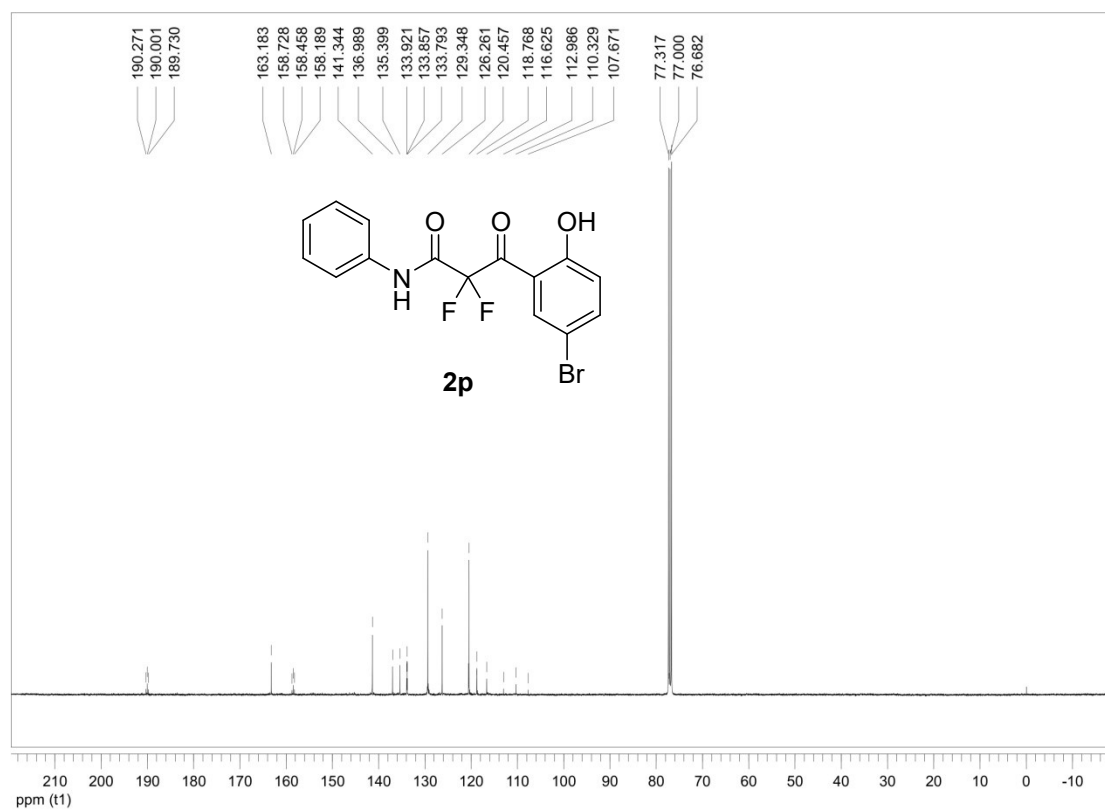

**2,2-difluoro-3-(2-hydroxy-5-methoxyphenyl)-3-oxo-*N*-(*m*-tolyl)propanamide (2q)**

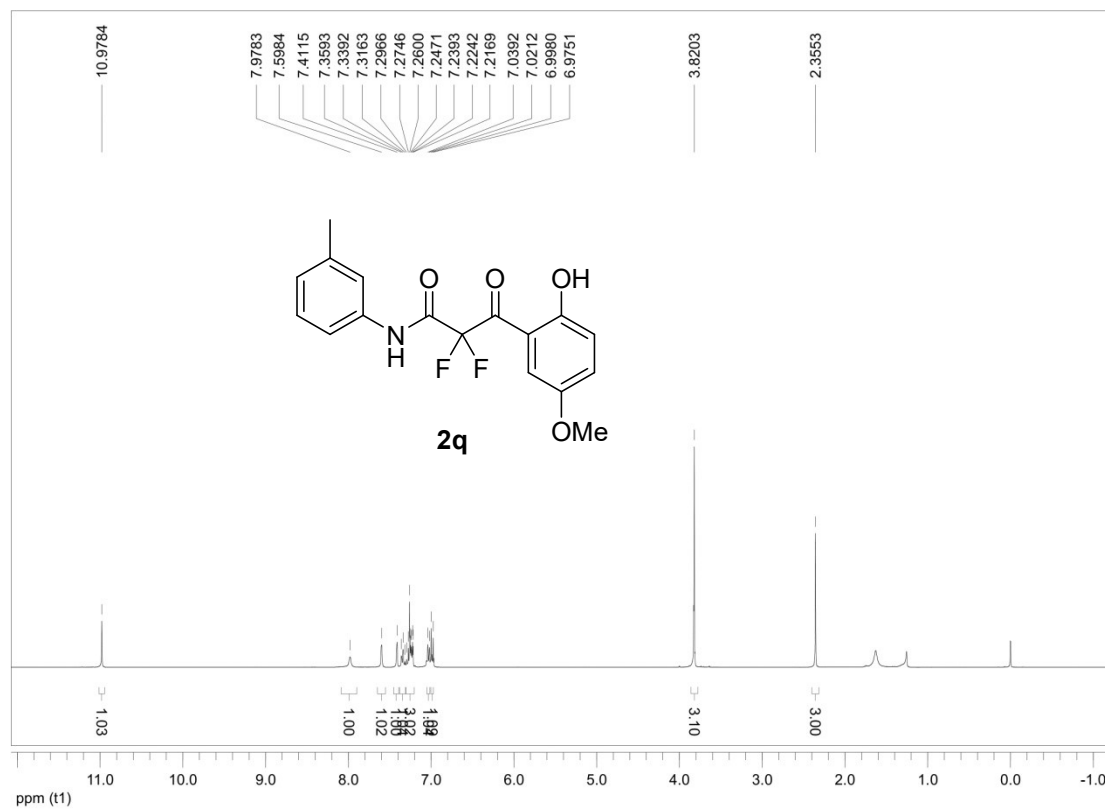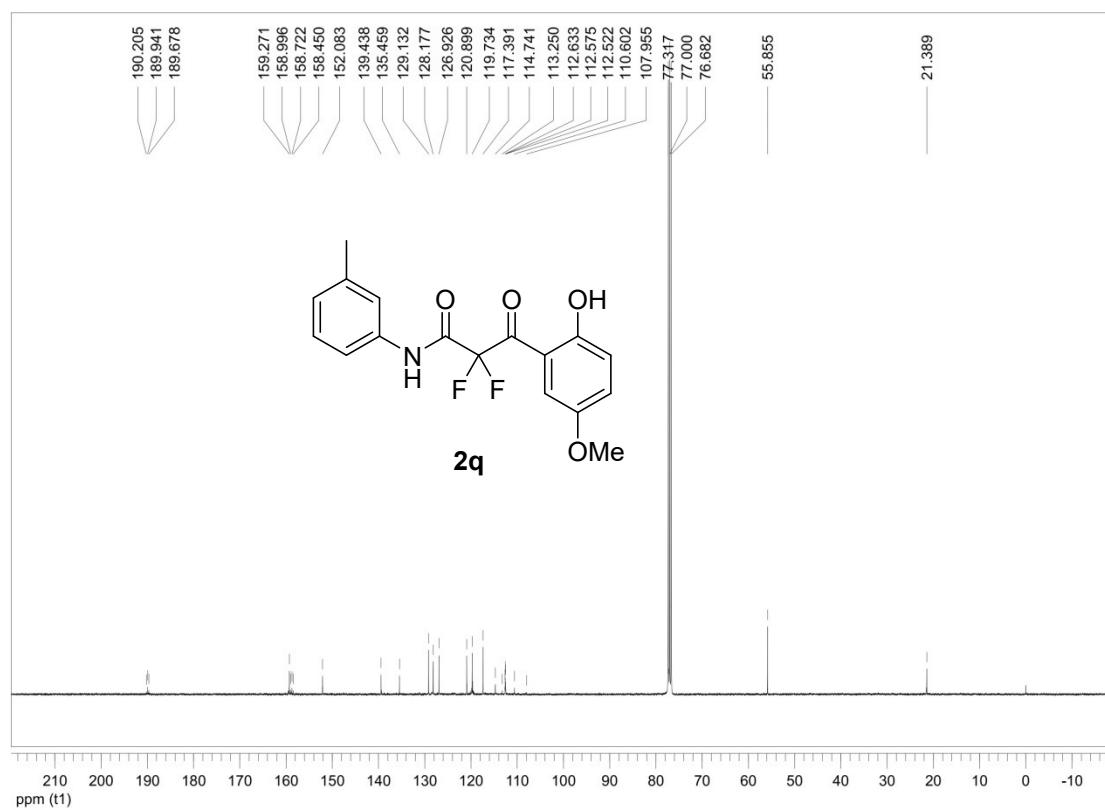

***N*-(4-bromophenyl)-2,2-difluoro-3-(2-hydroxy-4-methylphenyl)-3-oxopropanamide (2r)**

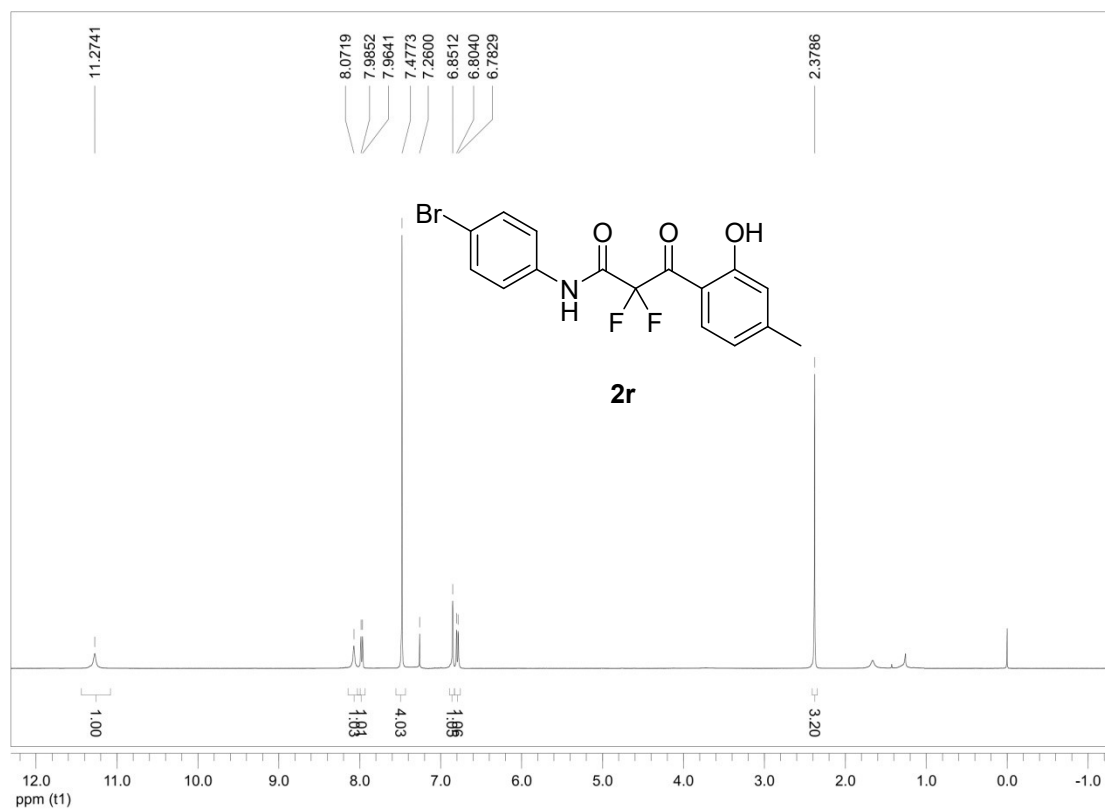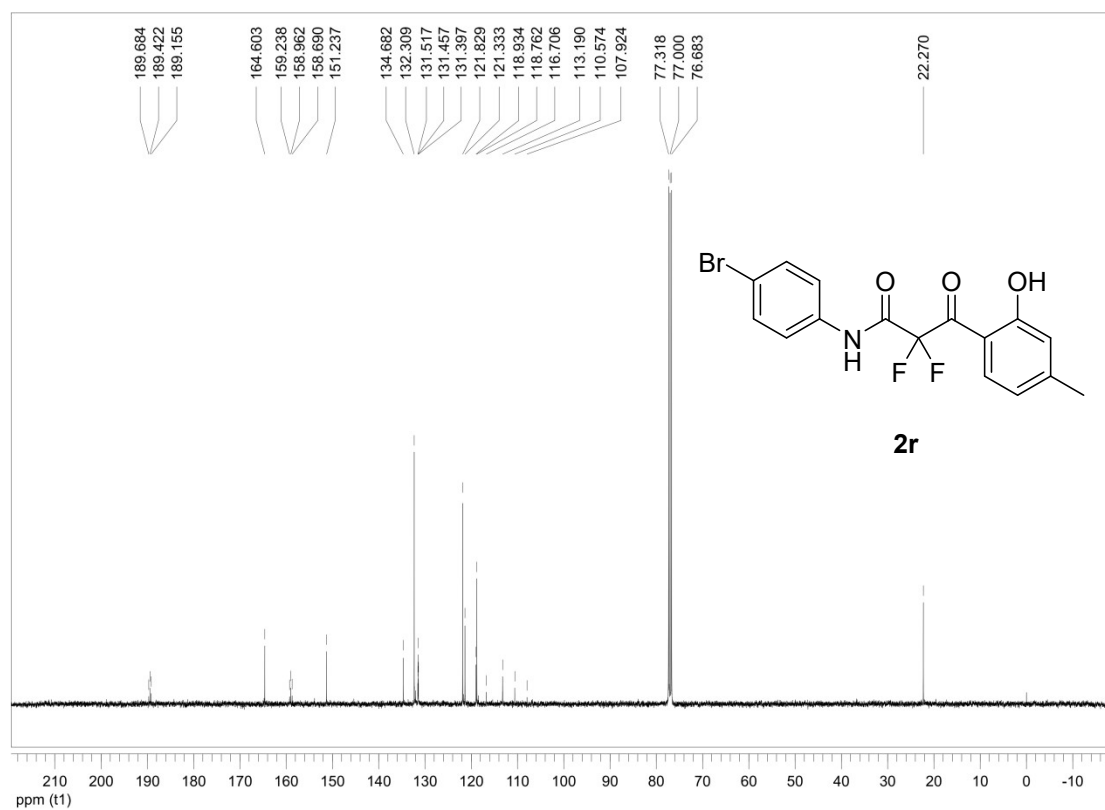

**2,2-difluoro-3-(2-hydroxyphenyl)-3-oxo-N-(3-(trifluoromethyl)phenyl)propanamide (2s)**

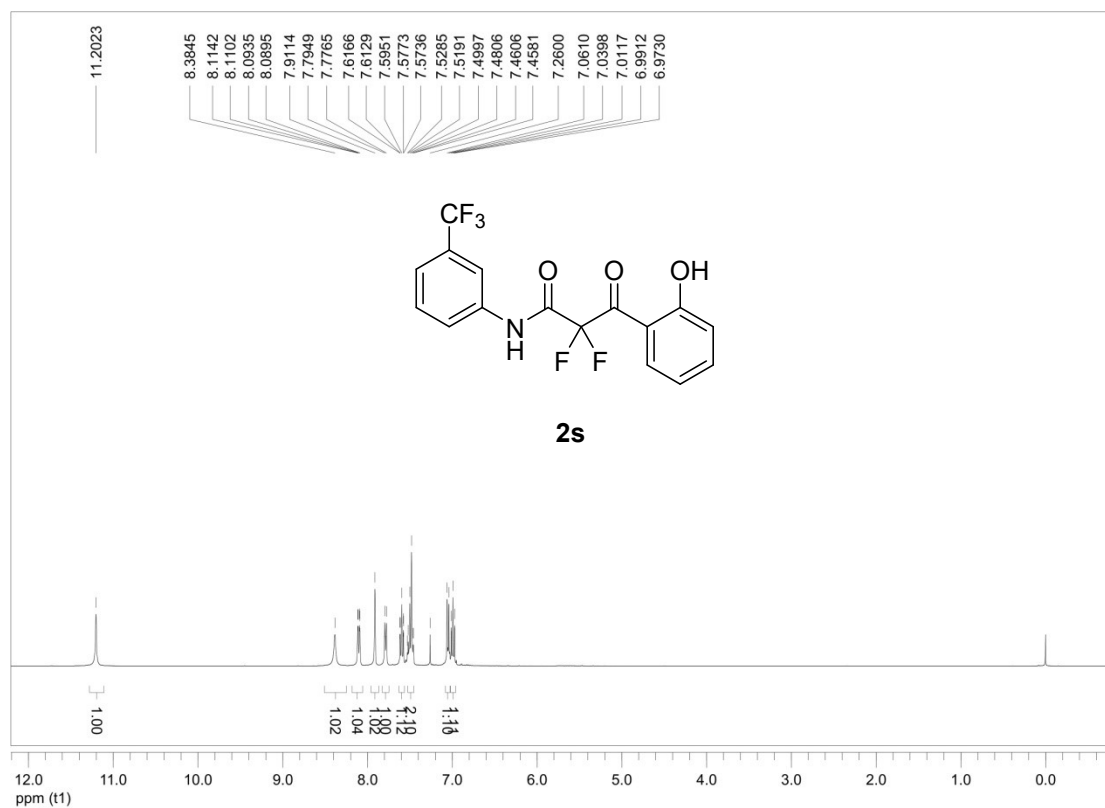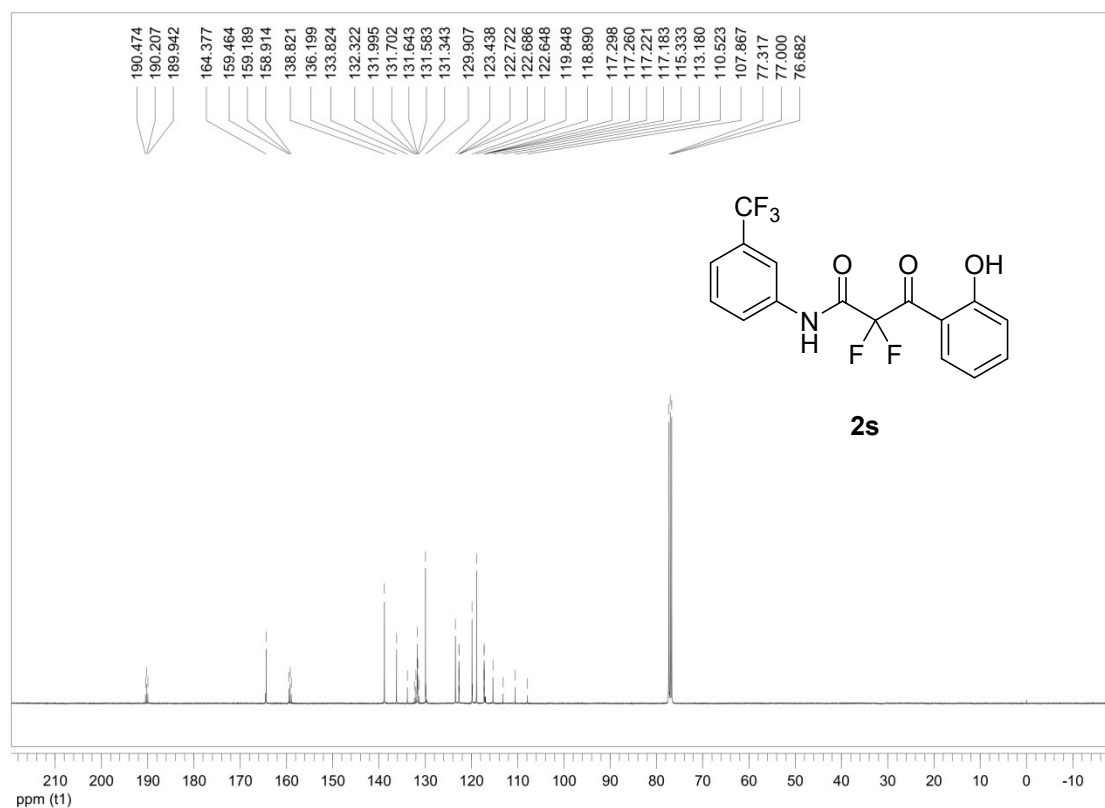

Supplement: d1qo01273h1.pdf [file d1qo01273h1.pdf]
